# Supplementary material for: RNAseq Reveals Complex Response of Campylobacter jejuni to Ovine Bile and In vivo Gallbladder Environment
Source: Front Microbiol. 2017 May 29;8:940. doi: 10.3389/fmicb.2017.00940 (PMC5447181; doi:10.3389/fmicb.2017.00940)
Supplement: Supplementary file 1 [file DataSheet1.XLSX]

## Sheet: S1 - RNAseq mapping statistics
	Supplementary Table S1: Mapping statistics for the Illumina RNAseq data for C. jejuni IA 3902 exposed to the sheep gallbladder in vivo and bile in vitro including chromosomal and pVir mapped reads
								Percent mapped reads
								Chromosome														pVir
		Total	Number of successfully aligned reads			Percent		Protein coding genes				Ribosomal RNA				Other known RNA				Unannotated		Protein coding genes				Unannotated
	Library	reads	Chromosome	pVir	Total	mapped reads		Sense		Antisense		Sense		Antisense		Sense		Antisense		regions		Sense		Antisense		regions
	IA 3902 sheep gallbladder 2 hr - 1	3213364	2405222	12658	2417880	0.752445		72		1		21		0		2		1		3		90		1		9
	IA 3902 sheep gallbladder 2 hr - 2	2802472	1989859	7305	1997164	0.712644		87		1		5		0		3		1		2		90		2		9
	IA 3902 sheep gallbladder 2 hr - 3	3977312	3843651	23073	3866724	0.972195		85		1		7		0		3		2		3		91		1		8
	IA 3902 sheep gallbladder 2 hr - 4	3452608	3352807	7167	3359974	0.97317		79		1		12		0		5		1		2		92		1		7
	IA 3902 sheep gallbladder 24 hr - 1	3625410	2859526	18047	2877573	0.793723		90		2		2		0		2		1		4		81		2		17
	IA 3902 sheep gallbladder 24 hr - 2	4342702	4066527	14730	4081257	0.939797		86		1		8		0		2		1		3		85		2		13
	IA 3902 sheep gallbladder 24 hr - 3	3016425	494901	3088	497989	0.165092		79		1		12		0		2		2		4		89		2		9
	IA 3902 bile in vitro 2 hrs - 1	3794841	3666255	22332	3688587	0.972		67		0		27		0		2		1		2		92		0		7
	IA 3902 bile in vitro 2 hrs - 2	5389416	5195381	10339	5205720	0.965915		58		0		33		0		4		2		3		94		1		5
	IA 3902 bile in vitro 2 hrs - 3	3610288	3465827	7170	3472997	0.961972		59		0		33		0		3		2		2		95		0		4
	IA 3902 bile in vitro 2 hrs - 4	2654785	2577672	1094	2578766	0.971365		6		0		93		0		0		0		0		91		1		9
	IA 3902 bile in vitro 24 hrs - 1	3299251	3190727	22126	3212853	0.973813		84		1		3		0		6		2		3		89		1		10
	IA 3902 bile in vitro 24 hrs - 2	2753010	2670812	15853	2686665	0.975901		89		1		3		0		2		2		3		92		1		7
	IA 3902 bile in vitro 24 hrs - 3	3461969	3330945	16918	3347863	0.96704		78		0		15		0		2		2		3		93		0		7
	IA 3902 bile in vitro 24 hrs - 4	3362952	3233165	9087	3242252	0.964109		55		0		35		0		5		1		3		91		1		8
	IA 3902 plate growth 16hr - 1	3663245	3430105	15841	3445946	0.940681		64		1		27		0		4		1		3		91		1		9
	IA 3902 plate growth 16hr - 2	3241200	3123409	13195	3136604	0.967729		65		0		26		0		5		1		2		94		1		6
	IA 3902 plate growth 16hr - 3	3636647	3463128	18606	3481734	0.957402		71		1		20		0		5		1		2		92		1		7
	IA 3902 plate growth 16hr - 4	2753937	2653828	21870	2675698	0.97159		85		1		6		0		5		1		2		92		0		7
	IA 3902 plate growth 16hr - 5	3311668	3198827	25085	3223912	0.973501		76		1		15		0		4		2		3		93		0		6
	IA 3902 plate growth 16hr - 6	4319642	4184757	30393	4215150	0.97581		76		0		14		0		4		2		3		93		0		6
	AVERAGE	3.50872e+06	3.16178e+06	15046.5	3.17682e+06	0.897519		71.9524		0.666667		19.8571		0		3.33333		1.38095		2.61905		90.9524		0.904762		8.09524
	MINIMUM	2654785	494901	1094	497989	0.165092		6		0		2		0		0		0		0		81		0		4
	MAXIMUM	5389416	5195381	30393	5205720	0.975901		90		2		93		0		6		2		4		95		2		17
	TOTAL	73683144			66713308	0.905408

## Sheet: S2-Sheep 24hr genes diff exp
Supplementary Table S2: Genes with demonstrated significant changes in expression, 24 hour gallbladder exposure
				Expression (RPKM)			Significance
Name	Synonym	COG Code	Product	plate 16hr	GB in vivo 24 hr		qValue	Fold change
DECREASED EXPRESSION AT 24 HOURS EXPOSURE TO GALLBLADDER
-	CJSA_0004a		hypothetical protein	45	17		0.000289242	-2.64706
-	CJSA_0005a	R	molybdopterin oxidoreductase family protein	45	21		0.00885775	-2.14286
gltD	CJSA_0009	ER	glutamate synthase subunit beta	114	31		1.55035e-08	-3.67742
-	CJSA_0016	R	ExsB protein	55	23		0.00603055	-2.3913
-	CJSA_0025	R	sodium/dicarboxylate symporter	151	50		2.6911e-05	-3.02
-	CJSA_0037	C	cytochrome c family protein	239	69		5.8994e-07	-3.46377
-	CJSA_0063	HJ	hypothetical protein	627	181		0.00030147	-3.46409
-	CJSA_0066b	S	hypothetical protein	409	98		2.04948e-11	-4.17347
-	CJSA_0067b	C	iron-sulfur cluster binding protein	1024	210		3.42988e-06	-4.87619
-	CJSA_0068b	C	putative oxidoreductase iron-sulfur subunit	991	168		3.35188e-15	-5.89881
lctP	CJSA_0069	C	L-lactate permease	1674	464		0.0297529	-3.60776
-	CJSA_0082c	R	putative lipoprotein	213	82		0.00217489	-2.59756
-	CJSA_0083c		hypothetical protein	108	44		0.00575992	-2.45455
-	CJSA_0084c	M	hypothetical protein	85	30		7.42031e-05	-2.83333
atpC	CJSA_0099	C	F0F1 ATP synthase subunit epsilon	278	119		0.0121329	-2.33613
-	CJSA_0158		hypothetical protein	1356	338		1.4288e-10	-4.01183
-	CJSA_0216	C	NifU family protein	790	233		0.000667782	-3.39056
cheW	CJSA_0259	NT	purine-binding chemotaxis protein CheW	516	218		0.0375057	-2.36697
peb3	CJSA_0265	R	major antigenic peptide PEB3	560	236		0.0337126	-2.37288
panD	CJSA_0270	H	aspartate alpha-decarboxylase	116	54		0.0126513	-2.14815
modA	CJSA_0277	P	molybdate transport system substrate-binding protein	207	54		1.13471e-09	-3.83333
-	CJSA_0301	J	endoribonuclease L-PSP family protein	98	44		0.0142339	-2.22727
-	CJSA_0335	S	hypothetical protein	55	24		0.0206457	-2.29167
-	CJSA_0388	E	putative GMC oxidoreductase subunit	248	72		7.87597e-05	-3.44444
-	CJSA_0399		hypothetical protein	721	243		0.000183703	-2.96708
uxaA	CJSA_0452d	G	putative altronate hydrolase N-terminus	79	34		0.0131204	-2.32353
uxaA	CJSA_0453d	G	putative altronate hydrolase C-terminus	79	20		2.13898e-11	-3.95
-	CJSA_0459	S	hypothetical protein	24	8		1.67421e-05	-3
purQ	CJSA_0484	F	phosphoribosylformylglycinamidine synthase I	130	54		0.00477874	-2.40741
mdh	CJSA_0499	C	malate dehydrogenase	413	157		0.013081	-2.63057
sucD	CJSA_0501	C	succinyl-coA synthetase alpha chain	824	265		0.0029168	-3.10943
oorB	CJSA_0504e	C	2-oxoglutarate-acceptor oxidoreductase subunit OorB	985	320		0.00679792	-3.07813
oorC	CJSA_0505e	C	2-oxoglutarate-acceptor oxidoreductase subunit OorC	966	227		3.24934e-07	-4.25551
-	CJSA_0520f	S	hypothetical protein	95	33		4.35777e-05	-2.87879
-	CJSA_0521f		hypothetical protein	140	22		2.72786e-36	-6.36364
fba	CJSA_0565	G	fructose-bisphosphate aldolase	831	293		0.0309121	-2.83618
hypE	CJSA_0594	O	hydrogenase expression/formation protein HypE	53	26		0.0251286	-2.03846
-	CJSA_0620g	E	M24 family peptidase	410	107		3.49427e-05	-3.83178
-	CJSA_0621g	E	MFS di-/tripeptide transporter	183	44		6.0324e-11	-4.15909
pta	CJSA_0652h	C	phosphate acetyltransferase	314	94		0.000608051	-3.34043
ackA	CJSA_0653h	C	acetate kinase	386	95		3.24934e-07	-4.06316
glnA	CJSA_0663	E	glutamine synthetase, type I	463	116		2.57731e-05	-3.99138
rpsP	CJSA_0674	J	30S ribosomal protein S16	452	203		0.0273227	-2.2266
-	CJSA_0685		hypothetical protein	109	48		0.00462691	-2.27083
-	CJSA_0787i	C	Na+/H+ antiporter family protein	64	23		0.000280264	-2.78261
-	CJSA_0788i	R	putative oxidoreductase	128	40		5.80152e-07	-3.2
-	CJSA_0849	E	putative amino-acid transport protein	461	137		0.000501684	-3.36496
hupB	CJSA_0858	L	DNA-binding protein HU-like protein	5807	1691		0.0443191	-3.43406
-	CJSA_0861j	S	hypothetical protein	147	38		2.55152e-10	-3.86842
cstA	CJSA_0862j	T	carbon starvation protein A	293	60		2.22544e-09	-4.88333
-	CJSA_0864k	E	amino acid ABC transporter permease	136	50		0.000128457	-2.72
-	CJSA_0865k	E	amino acid ABC transporter permease	594	127		2.78526e-10	-4.67717
peb1A	CJSA_0866k	ET	bifunctional adhesin/ABC transporter aspartate/glutamate-binding protein	3087	689		0.00404477	-4.48041
pebC	CJSA_0867k	E	amino acid ABC transporter ATP-binding protein	584	175		0.000218728	-3.33714
argH	CJSA_0876l	E	argininosuccinate lyase	134	59		0.0255488	-2.27119
pckA	CJSA_0877l	C	phosphoenolpyruvate carboxykinase	292	125		0.0346006	-2.336
-	CJSA_0880	R	putative sodium:amino-acid symporter family protein	22	8		0.000318123	-2.75
purH	CJSA_0898	F	bifunctional phosphoribosylaminoimidazolecarboxamide formyltransferase/IMP cyclohydrolase	40	16		0.000450881	-2.5
purL	CJSA_0900	F	phosphoribosylformylglycinamidine synthase II	42	18		0.0149899	-2.33333
cjaA	CJSA_0925	ET	putative amino-acid transporter periplasmic solute-binding protein	1299	311		2.86247e-05	-4.17685
hipO	CJSA_0928	R	hippurate hydrolase	90	22		4.44683e-13	-4.09091
-	CJSA_0930	P	putative MFS (Major Facilitator Superfamily) transport protein	75	18		8.31622e-12	-4.16667
-	CJSA_0948	O	putative membrane bound ATPase	31	15		0.0175767	-2.06667
-	CJSA_0955m		hypothetical protein	38	12		1.07998e-06	-3.16667
-	CJSA_0956m	O	putative cytochrome C biogenesis protein	45	20		0.0204626	-2.25
livM	CJSA_0959m'	E	high affinity branched-chain amino acid ABC transporter permease	37	19		0.0513691	-1.94737
livH	CJSA_0960m	E	high affinity branched-chain amino acid ABC transporter permease	91	40		0.0113339	-2.275
-	CJSA_1093	C	cytochrome c553	2759	880		0.0049814	-3.13523
-	CJSA_1102	S	hypothetical protein	279	109		0.000319843	-2.55963
metF	CJSA_1140	E	5,10-methylenetetrahydrofolate reductase	38	17		0.0148835	-2.23529
htrA	CJSA_1166	O	serine protease (protease DO)	319	118		0.0130421	-2.70339
hydD	CJSA_1203n	C	putative hydrogenase maturation protease	259	116		0.0235471	-2.23276
hydC	CJSA_1204n	C	Ni/Fe-hydrogenase B-type cytochrome subunit	635	223		0.00725297	-2.84753
acpP3	CJSA_1242		putative acyl carrier protein	69	32		0.0299493	-2.15625
fldA	CJSA_1316	C	lavodoxin FldA	1818	428		2.32717e-06	-4.24766
-	CJSA_1322	J	putative endoribonuclease L-PSP	477	131		1.55035e-08	-3.64122
-	CJSA_1408o		hypothetical protein	211	69		8.90119e-06	-3.05797
-	CJSA_1409o		hypothetical protein	506	218		0.0146085	-2.3211
putP	CJSA_1424p	ER	putative sodium/proline permease	451	50		1.57104e-63	-9.02
putA	CJSA_1425p	C	putative proline dehydrogenase/delta-1-pyrroline-5-carboxylate dehydrogenase	399	95		0.000517079	-4.2
moaE	CJSA_1439	H	putative molybdopterin converting factor,subunit 2	196	79		0.00244221	-2.48101
acs	CJSA_1453	I	acetyl-coenzyme A synthetase	406	87		2.23236e-07	-4.66667
-	CJSA_1456	H	putative tungsten ABC-transport system periplamic substrate binding protein	450	129		2.00757e-05	-3.48837
-	CJSA_1457	R	hypothetical protein	115	38		4.25955e-06	-3.02632
-	CJSA_1459	E	putative allophanate hydrolase subunit 2	50	23		0.0108208	-2.17391
nuol	CJSA_1483q	C	NADH dehydrogenase I subunit I	133	58		0.0112575	-2.2931
nuoH	CJSA_1484q	C	NADH dehydrogenase I subunit H	83	36		0.0144859	-2.30556
hisA	CJSA_1513	E	phosphoribosylformimino-5-aminoimidazole carboxamide ribotide isomerase	52	24		0.0212177	-2.16667
kgtP	CJSA_1531	G	alpha-ketoglutarate permease	364	108		0.000393717	-3.37037
sdaA	CJSA_1536r	E	L-serine dehydratase	533	151		0.000208336	-3.5298
sdaC	CJSA_1537r	E	amino acid transporter	397	173		0.0467993	-2.2948
p19	CJSA_1570s'	P	periplasmic protein p19	1423	546		0.0455398	-2.60623
-	CJSA_1572s	M	ABC transporter permease	54	24		0.00809348	-2.25
-	CJSA_1573s	M	ABC transporter permease	35	18		0.0480687	-1.94444
gltA	CJSA_1592	C	citrate synthase	1082	284		0.0055885	-3.80986
leuC	CJSA_1626	E	3-isopropylmalate dehydratase large subunit	52	21		0.000818628	-2.47619
virB9	CJSA_pVir0002t		VirB9	37	7		1.37091e-19	-5.28571
virB10	CJSA_pVir0003t		VirB10	23	5		1.22888e-19	-4.6
-	CJSA_pVir0008u		hypothetical protein	644	55		5.89141e-145	-11.7091
-	CJSA_pVir0009u		hypothetical protein	1372	130		9.78056e-63	-10.5538
-	CJSA_pVir0050v		hypothetical protein	128	17		1.20522e-56	-7.52941
-	CJSA_pVir0051v		hypothetical protein	40	8		1.44458e-17	-5
-	CJSA_CjSRP1		-	18640	1476		2.98337e-74	-12.6287
-	CJSA_t0030		Ser tRNA	436	105		3.00301e-12	-4.15238
-	predicted RNA		antisense: CJSA_1568; 87nt length, 1577262 to 1577349 positive strand	216	30		2.11947e-51	-7.2
-	predicted RNA		176nt length; 1331258 to 1331434 positive strand	198	37		2.01334e-24	-5.35135
-	predicted RNA		10nt length; 443535 to 443545 positive strand	147	39		3.7006e-07	-3.76923
-	predicted RNA		255nt length; 1457504 to 1457759 positive strand	277	77		6.04659e-09	-3.5974
-	predicted RNA		13nt length; 1183928 to 1183941 positive strand	961	278		6.82696e-09	-3.45683
-	predicted RNA		antisense: glnQ; 86nt length, 845047 to 844961 negative strand	179	52		2.40897e-08	-3.44231
-	predicted RNA		106nt length; 1331076 to 1331182 positive strand	233	100		0.0135025	-2.33
-	predicted RNA		32nt length; 577201 to 577169 negative strand	312	136		0.00684097	-2.29412
-	predicted RNA		antisense: CJSA_0192; 299nt length, 198809 to 199108 positive strand	1528	667		0.0396738	-2.29085
-	predicted RNA		antisense: CJSA_0215; 50nt length; 226428 to 226378 negative strand	136	69		0.0441171	-1.97101
INCREASED EXPRESSION AT 24 HOURS EXPOSURE TO GALLBLADDER
dnaA	CJSA_0001	L	chromosomal replication initiator protein DnaA	21	50		2.21968e-06	2.38095
dnaN	CJSA_0002	L	DNA polymerase III subunit beta	32	106		7.23151e-13	3.3125
dsbI	CJSA_0017a	O	DsbB family disulfide bond formation protein	78	210		1.00124e-09	2.69231
dba	CJSA_0018a		disulfide bond formation protein	46	301		3.80357e-84	6.54348
-	CJSA_0030b		hypothetical protein	2	70		0	35
-	CJSA_0031b		hypothetical protein	1	35		0	35
-	CJSA_0035	G	MFS family drug resistance transporter	15	49		5.86414e-17	3.26667
-	CJSA_0040c		hypothetical protein	15	783		0	52.2
-	CJSA_0041c		hypothetical protein	62	379		6.33812e-65	6.1129
flgD	CJSA_0042c	N	flagellar basal body rod modification protein	309	824		5.0436e-05	2.66667
flgE	CJSA_0043c	N	flagellar hook protein	160	534		6.76602e-08	3.3375
-	CJSA_0045	P	putative iron-binding protein	39	208		4.18579e-40	5.33333
-	CJSA_0049		hypothetical protein	53	207		3.71062e-19	3.90566
fliM	CJSA_0054d	N	flagellar motor switch protein FliM	61	158		1.26331e-08	2.59016
fliA	CJSA_0055d	K	flagellar biosynthesis sigma factor	77	336		3.07106e-25	4.36364
-	CJSA_0056d		hypothetical protein	34	361		7.60349e-290	10.6176
folK	CJSA_0059	H	2-amino-4-hydroxy-6-hydroxymethyldihydropteridine pyrophosphokinase	21	70		3.50423e-18	3.33333
-	CJSA_0061	FR	chlorohydrolase	13	27		4.9501e-05	2.07692
-	CJSA_0065	P	hemerythrin family non-heme iron protein	7	33		2.03144e-24	4.71429
cdtC	CJSA_0070		cytolethal distending toxin C	19	29		0.0101336	1.52632
cydA	CJSA_0074	C	cytochrome d ubiquinol oxidase, subunit I	10	31		1.34324e-13	3.1
-	CJSA_0080	S	putative lipoprotein	36	82		9.24828e-06	2.27778
obgE	CJSA_0087	R	GTPase ObgE	40	135		1.89748e-14	3.375
proB	CJSA_0088e	E	gamma-glutamyl kinase	23	69		8.6612e-14	3
fmt	CJSA_0089e	J	methionyl-tRNA formyltransferase	11	27		8.89048e-09	2.45455
birA	CJSA_0090e	H	biotin--protein ligase	20	44		1.3718e-06	2.2
-	CJSA_0091e	D	ParA family chromosome partitioning ATPase	73	153		4.38736e-05	2.09589
-	CJSA_0092e	K	ParB family chromosome partitioning protein	29	62		2.89047e-05	2.13793
atpF'	CJSA_0093e	C	F0F1 ATP synthase subunit B	67	276		1.34875e-22	4.1194
atpF	CJSA_0094e	C	F0F1 ATP synthase subunit B	37	147		1.10563e-26	3.97297
atpH	CJSA_0095e	C	F0F1 ATP synthase subunit delta	2	39		0	19.5
-	CJSA_0102e'		TonB domain-containing protein	17	48		4.33262e-12	2.82353
tolB	CJSA_0103e'	U	translocation protein TolB	73	146		1.30073e-05	2
-	CJSA_0105	S	hypothetical protein	147	263		0.00089442	1.78912
-	CJSA_0110f	Q	putative pyrazinamidase/nicotinamidase	18	52		2.53573e-13	2.88889
-	CJSA_0111f		putative recombination protein RecO	5	28		5.78583e-31	5.6
-	CJSA_0112f	R	putative metalloprotease	17	33		0.000115389	1.94118
-	CJSA_0113f		hypothetical protein	115	338		6.84043e-12	2.93913
-	CJSA_0119	G	inositol monophosphatase family protein	16	25		0.00462691	1.5625
-	CJSA_0124g	O	putative glycoprotease family protein	10	39		1.43282e-19	3.9
thrB	CJSA_0125g	E	homoserine kinase	23	46		2.86247e-05	2
-	CJSA_0126g	K	hypothetical protein	19	83		1.13705e-25	4.36842
-	CJSA_0142h		hypothetical protein	5	28		3.47435e-43	5.6
-	CJSA_0143h		hypothetical protein	56	136		5.86127e-07	2.42857
-	CJSA_0144h	J	RNA methyltransferase	134	255		4.33514e-05	1.90299
-	CJSA_0145h	R	tetrapyrrole methylase family protein	28	47		0.00660079	1.67857
-	CJSA_0149i	C	cytochrome c family protein	31	50		0.00547256	1.6129
-	CJSA_0150i	H	putative 6-pyruvoyl tetrahydropterin synthase	53	102		0.00074776	1.92453
-	CJSA_0154		hypothetical protein	7	35		1.33571e-28	5
-	CJSA_0161	QR	hypothetical protein	38	93		2.45426e-08	2.44737
-	CJSA_0166		putative lipoprotein	14	173		2.19929e-219	12.3571
-	CJSA_0167	S	TonB-dependent colicin lipoprotein, putative	2	35		3.07919e-296	17.5
-	CJSA_0172	I	putative transporter	21	51		1.39155e-06	2.42857
argC	CJSA_0201	E	N-acetyl-gamma-glutamyl-phosphate reductase	55	92		0.00402513	1.67273
-	CJSA_0207j'	H	nicotinate phosphoribosyltransferase	20	38		0.00101663	1.9
-	CJSA_0209j	S	hypothetical protein	17	62		1.38033e-19	3.64706
pyrE	CJSA_0210j	F	orotate phosphoribosyltransferase	272	407		0.0321721	1.49632
frr	CJSA_0211j	J	ribosome recycling factor	238	351		0.0114229	1.47479
secG	CJSA_0212j	U	preprotein translocase subunit SecG	237	394		0.000815711	1.66245
cynT	CJSA_0214k	P	carbonic anyhydrase	41	75		0.00174891	1.82927
-	CJSA_0215k	M	mechanosensitive ion channel family protein	16	29		0.00494222	1.8125
-	CJSA_0219		hypothetical protein	1	37		0	37
-	CJSA_0228		hypothetical protein	65	113		0.000552602	1.73846
-	CJSA_0233l	R	sulfatase	14	35		7.78323e-09	2.5
dgkA	CJSA_0234l	M	diacylglycerol kinase	10	49		3.88911e-32	4.9
pyrC	CJSA_0236l'	F	dihydroorotase	13	36		2.78596e-11	2.76923
-	CJSA_0238	H	putative SAM-dependent methyltransferase	11	35		2.2861e-15	3.18182
-	CJSA_0240	P	zinc transporter ZupT	12	25		6.1618e-06	2.08333
mreC	CJSA_0254	M	rod shape-determining protein MreC	35	55		0.0149331	1.57143
-	CJSA_0262	S	hypothetical protein	17	37		3.2308e-06	2.17647
lpxB	CJSA_0264	M	lipid-A-disaccharide synthase	34	57		0.00994894	1.67647
surE	CJSA_0267	R	stationary phase survival protein SurE	27	42		0.00930955	1.55556
-	CJSA_0283m	P	SMR family multidrug efflux pump	22	32		0.0257307	1.45455
-	CJSA_0284m	P	SMR family multidrug efflux pump	13	39		2.5165e-10	3
pth	CJSA_0286n	J	peptidyl-tRNA hydrolase	85	168		0.000256023	1.97647
-	CJSA_0287n	R	hypothetical protein	2	28		3.53497e-244	14
perR	CJSA_0296	P	FUR family transcriptional regulator	47	168		1.18118e-20	3.57447
ubiE	CJSA_0298	H	ubiquinone/menaquinone biosynthesis methyltransferase	15	30		3.35642e-05	2
fabH	CJSA_0302o	I	3-oxoacyl-ACP synthase	39	115		2.5165e-10	2.94872
plsX	CJSA_0303o	I	putative glycerol-3-phosphate acyltransferase PlsX	116	253		2.38946e-06	2.18103
-	CJSA_0305o'		hypothetical protein	124	603		7.75824e-33	4.8629
ndk	CJSA_0306o'	F	nucleoside diphosphate kinase	455	849		0.0080097	1.86593
flhB	CJSA_0309	NU	flagellar biosynthesis protein FlhB	85	202		3.46728e-08	2.37647
trpE	CJSA_0319	EH	anthranilate synthase component I	41	66		0.0101108	1.60976
trpF	CJSA_0321	E	N-(5phosphoribosyl)anthranilate isomerase	23	37		0.00472955	1.6087
-	CJSA_0326		putative transmembrane protein	11	35		4.82846e-14	3.18182
-	CJSA_0327p	FP	Ppx/GppA family phosphatase	24	41		0.00679792	1.70833
fdxB	CJSA_0328p	C	ferredoxin, 4Fe-4S	102	194		0.000501684	1.90196
-	CJSA_0337		hypothetical protein	2	36		5.29965e-255	18
cmeC	CJSA_0338q	MU	RND efflux system, outer membrane lipoprotein CmeC	62	92		0.00464662	1.48387
cmeB	CJSA_0339q	V	RND efflux system, inner membrane transporter CmeB	82	138		0.0313728	1.68293
cmeA	CJSA_0340q	M	RND efflux system, membrane fusion protein CmeA	102	269		1.69287e-09	2.63725
-	CJSA_0344		hypothetical protein	151	233		0.00255825	1.54305
-	CJSA_0348r		putative lipoprotein	9	28		2.16101e-10	3.11111
-	CJSA_0349r		hypothetical protein	5	27		2.85825e-42	5.4
-	CJSA_0358	S	integral membrane protein	16	26		0.00478264	1.625
-	CJSA_0370		hypothetical protein	9	59		5.75831e-69	6.55556
-	CJSA_0372	R	colicin V production protein-like protein	93	140		0.0317331	1.50538
-	CJSA_0384	R	GTP-binding protein	10	26		3.32411e-07	2.6
-	CJSA_0389		hypothetical protein	178	669		4.16904e-19	3.75843
-	CJSA_0390		hypothetical protein	30	62		1.24325e-05	2.06667
-	CJSA_0394		putative H-T-H containing protein	20	54		3.74581e-08	2.7
-	CJSA_0395		hypothetical protein	14	25		0.0136406	1.78571
mraY	CJSA_0405	M	phospho-N-acetylmuramoyl-pentapeptide-transferase	13	34		3.38608e-09	2.61538
sdhA	CJSA_0409s	C	succinate dehydrogenase, flavoprotein subunit	35	85		2.81098e-07	2.42857
sdhB	CJSA_0410s	C	succinate dehydrogenase, iron-sulfur protein subunit	37	74		0.000259514	2
-	CJSA_0417		NUDIX domain-containing protein	21	50		1.26652e-07	2.38095
rpe	CJSA_0421	G	ribulose-phosphate 3-epimerase	33	73		4.05557e-06	2.21212
-	CJSA_0424t		hypothetical protein	10	27		8.45779e-09	2.7
-	CJSA_0425t		hypothetical protein	10	33		5.35599e-13	3.3
-	CJSA_0426t		hypothetical protein	12	125		7.28164e-275	10.4167
-	CJSA_0427t	S	hypothetical protein	56	178		2.96127e-12	3.17857
-	CJSA_0429t'		hypothetical protein	94	216		3.47754e-06	2.29787
nusA	CJSA_0430	K	transcription elongation factor NusA	63	129		2.99983e-05	2.04762
ctb	CJSA_0435	R	group III truncated hemoglobin	29	49		0.000695106	1.68966
paqP	CJSA_0437	E	amino-acid ABC transporter integral membrane protein	24	35		0.0204799	1.45833
rpmG	CJSA_0441	J	50S ribosomal protein L33	367	857		1.5376e-06	2.33515
secE	CJSA_0442	U	preprotein translocase subunit SecE	583	947		0.00143729	1.62436
-	CJSA_0465u		hypothetical protein	21	68		2.6431e-12	3.2381
-	CJSA_0466u	R	putative methyltransferase domain protein	4	27		4.50408e-54	6.75
-	CJSA_0467u	R	hypothetical protein	53	92		0.00113051	1.73585
-	CJSA_0474v	R	Gfo/Idh/MocA family oxidoreductase	11	25		1.97267e-07	2.27273
-	CJSA_0475v	M	DegT/DnrJ/EryC1/StrS aminotransferase family protein	41	76		0.00149217	1.85366
pbpB	CJSA_0492w	M	penicillin-binding protein	15	77		1.69157e-34	5.13333
fliE	CJSA_0493w	NU	flagellar hook-basal body protein FliE	287	885		7.87167e-14	3.08362
flgC	CJSA_0494w	N	flagellar basal-body rod protein FlgC	461	1258		3.42297e-05	2.72885
flgB	CJSA_0495w	N	flagellar basal-body rod protein FlgB	362	1355		7.70333e-15	3.74309
-	CJSA_0506x		hypothetical protein	23	100		1.76328e-26	4.34783
-	CJSA_0507x		hypothetical protein	23	74		9.81515e-17	3.21739
-	CJSA_0508x	H	polyprenyl synthetase family protein	18	49		3.32103e-10	2.72222
-	CJSA_0517		hypothetical protein	172	299		0.00351661	1.73837
-	CJSA_0528		hypothetical protein	55	1172		0	21.3091
ribB	CJSA_0540	H	bifunctional 3,4-dihydroxy-2-butanone 4-phosphate synthase/GTP cyclohydrolase II protein	82	132		0.00192628	1.60976
tatC	CJSA_0546y	U	Sec-independent protein translocase TatC	17	46		8.61143e-11	2.70588
tatB	CJSA_0547y	U	sec-independent translocase	36	114		5.70703e-16	3.16667
nidH	CJSA_0549	LR	dinucleoside polyphosphate hydrolase	68	162		3.54228e-06	2.38235
nth	CJSA_0563	L	endonuclease III	11	43		2.55157e-21	3.90909
-	CJSA_0572	S	putative polyphosphate kinase	23	41		0.000863717	1.78261
-	CJSA_0574z	M	putative secretion protein HlyD	34	73		4.34446e-05	2.14706
-	CJSA_0575z	V	ABC-type transmembrane transport protein	15	30		0.000354075	2
pstS	CJSA_0581	P	phosphate transport system substrate-binding protein	22	44		7.48794e-05	2
-	CJSA_0585		hypothetical protein	29	54		0.000123657	1.86207
-	CJSA_0596	L	prophage Lp2 protein 6	72	171		2.4684e-07	2.375
-	CJSA_0600	S	hypothetical protein	17	43		1.57148e-08	2.52941
pnk	CJSA_0608aa	G	inorganic polyphosphate/ATP-NAD kinase	20	51		7.86361e-09	2.55
recN	CJSA_0609aa	L	DNA repair protein RecN	15	26		0.00178175	1.73333
cbrR	CJSA_0610bb	T	response regulator/GGDEF domain-containing protein	70	136		3.31664e-05	1.94286
-	CJSA_0611bb	L	TatD family hydrolase	53	78		0.0460431	1.4717
-	CJSA_0616bb'	S	OstA family protein	16	39		4.88885e-08	2.4375
-	CJSA_0623	E	MFS di-/tripeptide transporter	34	51		0.0420641	1.5
-	CJSA_0632	R	putative ATP/GTP-binding protein	21	39		0.000189331	1.85714
rpoN	CJSA_0634	K	RNA polymerase factor sigma-54	14	29		1.51225e-05	2.07143
-	CJSA_0636		hypothetical protein	26	73		1.24235e-08	2.80769
-	CJSA_0646cc		hypothetical protein	109	215		0.000270219	1.97248
-	CJSA_0647cc		hypothetical protein	10	44		8.21443e-27	4.4
priA	CJSA_0648cc	L	primosome assembly protein PriA	6	28		2.68111e-37	4.66667
flgH	CJSA_0651	N	flagellar basal body L-ring protein	197	864		1.18206e-25	4.38579
-	CJSA_0655		hypothetical protein	16	79		7.62237e-44	4.9375
mraW	CJSA_0657	M	S-adenosyl-methyltransferase MraW	9	31		5.59474e-19	3.44444
-	CJSA_0658	O	hypothetical protein	44	140		1.35937e-13	3.18182
flgG2	CJSA_0661dd	N	flagellar basal-body rod protein	359	1124		3.25105e-07	3.13092
flgG	CJSA_0662dd	N	flagellar basal-body rod protein FlgG	368	1069		3.74889e-06	2.90489
-	CJSA_0664ee		hypothetical protein	100	164		0.00296395	1.64
-	CJSA_0665ee	O	peptidase, U32 family	72	107		0.00530223	1.48611
-	CJSA_0667ee'		hypothetical protein	47	76		0.0135551	1.61702
-	CJSA_0669ee	S	hypothetical protein	13	27		3.59905e-06	2.07692
-	CJSA_0670ee	R	hypothetical protein	72	202		2.38429e-09	2.80556
kdtA	CJSA_0671ee	M	3-deoxy-D-manno-octulosonic-acid transferase	4	27		7.1352e-50	6.75
-	CJSA_0672ee	J	putative ribosomal pseudouridine synthase	22	42		0.000118622	1.90909
ffh	CJSA_0673ee	U	signal recognition particle protein	87	141		0.00217489	1.62069
rimM	CJSA_0676ff	J	16S rRNA processing protein RimM	83	160		0.000580545	1.92771
trmD	CJSA_0677ff	J	tRNA (guanine-N(1)-)-methyltransferase	22	88		1.86358e-27	4
rplS	CJSA_0678ff	J	50S ribosomal protein L19	307	546		0.000370851	1.7785
-	CJSA_0681	P	putative ArsC family protein	81	185		5.92457e-06	2.28395
-	CJSA_0688		hypothetical protein	96	144		0.0161724	1.5
corA	CJSA_0690	P	magnesium and cobalt transport protein	88	162		0.000119315	1.84091
-	CJSA_0699		hypothetical protein	9	44		1.04044e-35	4.88889
-	CJSA_0708		hypothetical protein	3	126		0	42
tonB3	CJSA_0710	M	TonB transport protein	23	73		7.22445e-16	3.17391
cfrA	CJSA_0712	P	ferric enterobactin uptake receptor	22	95		3.41691e-23	4.31818
hcrA	CJSA_0713gg	K	heat-inducible transcription repressor	265	1056		9.26628e-12	3.98491
grpE	CJSA_0714gg	O	heat shock protein GrpE	346	885		3.99224e-05	2.5578
-	CJSA_0716hh	R	hypothetical protein	64	177		5.93063e-10	2.76562
-	CJSA_0717hh	S	hypothetical protein	40	114		2.49304e-12	2.85
flgA	CJSA_0725ii	NO	flagellar basal body P-ring biosynthesis protein FlgA	10	40		7.49295e-23	4
-	CJSA_0726ii	P	NLPA family lipoprotein	52	118		6.5073e-06	2.26923
-	CJSA_0727ii	P	NLPA family lipoprotein	97	259		1.77105e-09	2.6701
-	CJSA_0732		hypothetical protein	43	92		3.96033e-05	2.13953
napL	CJSA_0740jj		hypothetical protein	11	31		1.72994e-13	2.81818
napD	CJSA_0741jj	P	NapD protein-like protein	7	46		1.06863e-51	6.57143
-	CJSA_0743jj'		hypothetical protein	31	89		6.42087e-12	2.87097
-	CJSA_0744jj		hypothetical protein	33	96		1.91864e-12	2.90909
-	CJSA_0745jj	J	polyA polymerase family protein	18	45		5.77026e-08	2.5
purU	CJSA_0746jj	F	formyltetrahydrofolate deformylase	22	48		4.47578e-06	2.18182
flgS	CJSA_0749	T	sensor histidine kinase	11	35		1.28655e-15	3.18182
murF	CJSA_0751	M	Mur ligase family protein	8	29		2.06047e-18	3.625
-	CJSA_0753		prevent-host-death family protein	6	29		1.23933e-22	4.83333
-	CJSA_0765	R	metallo-beta-lactamase family protein	21	34		0.00330838	1.61905
-	CJSA_0770		hypothetical protein	3	30		1.54064e-147	10
-	CJSA_0773kk		putative lipoprotein	47	185		1.69071e-27	3.93617
-	CJSA_0774kk		small hydrophobic protein	10	57		3.06021e-36	5.7
-	CJSA_0785	S	hypothetical protein	11	107		2.35602e-167	9.72727
-	CJSA_0794		hypothetical protein	22	34		0.0374385	1.54545
mobB	CJSA_0796	H	molybdopterin-guanine dinucleotide biosynthesis protein MobB	5	43		9.35688e-89	8.6
-	CJSA_0801ll	R	Ser/Thr protein phosphatase family protein	22	51		2.62401e-06	2.31818
psd	CJSA_0802ll	I	phosphatidylserine decarboxylase	30	59		0.000169472	1.96667
-	CJSA_0805		putative MFS (Major Facilitator Superfamily) transport protein	12	53		2.47513e-32	4.41667
-	CJSA_0809		hypothetical protein	45	78		0.00148592	1.73333
fspA2	CJSA_0814		FspA2	114	381		9.00467e-14	3.34211
-	CJSA_0818mm		hypothetical protein	109	175		0.0158301	1.6055
dsbB	CJSA_0819mm	O	putative disulfide oxidoreductase	54	97		0.00246826	1.7963
-	CJSA_0822nn	C	hypothetical protein	19	53		1.72008e-08	2.78947
-	CJSA_0823nn	C	putative cytochrome C	90	166		0.000979634	1.84444
-	CJSA_0825		hypothetical protein	3	73		0	24.3333
flhA	CJSA_0829oo	NU	flagellar biosynthesis protein FlhA	19	38		0.000373326	2
-	CJSA_0830oo	K	RrF2 family protein, putative	35	159		5.93986e-36	4.54286
rspO	CJSA_0831	J	30S ribosomal protein S15	212	480		4.53453e-06	2.26415
ftsK	CJSA_0832	D	putative cell division protein	22	62		2.77954e-10	2.81818
flgL	CJSA_0833	N	flagellar hook-associated protein FlgL	155	817		3.38121e-20	5.27097
-	CJSA_0846		small hydrophobic protein	10	31		4.01022e-08	3.1
alr	CJSA_0851	M	alanine racemase	8	35		2.04457e-32	4.375
-	CJSA_0852	S	hypothetical protein	30	126		1.83607e-23	4.2
cheR	CJSA_0868	NT	putative MCP protein methyltransferase	25	66		2.40308e-10	2.64
rpiB	CJSA_0870pp	G	ribose 5-phosphate isomerase B	54	143		3.54159e-09	2.64815
-	CJSA_0871pp		hypothetical protein	25	81		3.1876e-16	3.24
apt	CJSA_0872pp	F	adenine phosphoribosyltransferase	39	65		0.00337423	1.66667
aas	CJSA_0883qq	IQ	2-acylglycerophosphoethanolamine acyltransferase	14	29		0.000101852	2.07143
-	CJSA_0884qq		hypothetical protein	1	60		0	60
-	CJSA_0894	E	peptidyl-arginine deiminase family protein	24	41		0.00481408	1.70833
-	CJSA_0897		putative HAMP containing membrane protein	22	45		1.62357e-05	2.04545
-	CJSA_0904rr	S	hypothetical protein	84	155		0.00158601	1.84524
rnpA	CJSA_0905rr	J	ribonuclease P protein component	312	463		0.00498869	1.48397
-	CJSA_0910	R	putative acyl-CoA thioester hydrolase	31	85		2.30403e-11	2.74194
-	CJSA_0920	Q	hypothetical protein	521	1943		1.29284e-10	3.72937
rpoD	CJSA_0944	K	RNA polymerase sigma factor RpoD	83	239		3.10013e-08	2.87952
-	CJSA_0952	S	TrkA domain-containing protein	17	35		0.000144339	2.05882
tgt	CJSA_0953	J	queuine tRNA-ribosyltransferase	15	28		0.000166268	1.86667
-	CJSA_0964		porin domain-containing protein	16	81		3.102e-36	5.0625
flgR	CJSA_0967ss	T	sigma-54 associated transcriptional activator	34	178		3.76222e-37	5.23529
-	CJSA_0968ss		hypothetical protein	82	438		1.06782e-40	5.34146
-	CJSA_0971ss'	R	putative purine/pyrimidine phosphoribosyltransferase	28	49		0.00143949	1.75
cmeD	CJSA_0974tt	MU	outer membrane component of efflux system (multidrug efflux system CmeDEF)	19	73		6.87269e-22	3.84211
cmeE	CJSA_0975tt	M	membrane fusion component of efflux system (multidrug efflux system CmeDEF)	23	45		3.05053e-05	1.95652
-	CJSA_0977	O	adenylosuccinate lyase	37	191		3.45863e-38	5.16216
-	CJSA_0983uu	P	putative MFS (Major Facilitator Superfamily) transport protein	5	33		1.85659e-57	6.6
-	CJSA_0984uu		putative periplasmic ATP/GTP-binding protein	20	32		0.00955148	1.6
thiS	CJSA_0990	H	thiamine biosynthesis protein ThiS	29	43		0.04201	1.48276
murC	CJSA_0997	M	UDP-N-acetylmuramate--L-alanine ligase	34	54		0.0208575	1.58824
rpsF	CJSA_1012vv	J	30S ribosomal protein S6	557	945		0.026897	1.69659
ssb	CJSA_1013vv	L	single-stranded DNA-binding protein	392	700		0.018461	1.78571
-	CJSA_1016	R	putative lipoprotein	70	126		0.00220276	1.8
-	CJSA_1017	S	flagellar assembly factor FliW	137	372		8.43094e-09	2.71533
mfd	CJSA_1027	LK	transcription-repair coupling factor	23	44		0.00019882	1.91304
-	CJSA_1029ww	M	M24/M37 family peptidase	60	142		2.03904e-06	2.36667
folC	CJSA_1030ww	H	olylpolyglutamate synthase/dihydrofolate synthase	7	45		7.85127e-71	6.42857
-	CJSA_1039xx	E	serine/threonine transporter SstT	14	35		1.71767e-09	2.5
pyrB	CJSA_1040xx	F	aspartate carbamoyltransferase catalytic subunit	19	33		0.00115023	1.73684
csrA	CJSA_1045xx'	T	carbon storage regulator	89	162		0.000328538	1.82022
-	CJSA_1046xx	I	4-diphosphocytidyl-2-C-methyl-D-erythritol kinase	13	35		3.21089e-10	2.69231
prmA	CJSA_1059yy	J	50S ribosomal protein L11 methyltransferase	82	201		9.84185e-08	2.45122
cheY	CJSA_1060yy	T	chemotaxis protein CheY	470	791		0.0172122	1.68298
-	CJSA_1086		hypothetical protein	7	37		1.04384e-35	5.28571
gmhB	CJSA_1092	E	D,D-heptose 1,7-bisphosphate phosphatase	10	32		2.24159e-12	3.2
-	CJSA_1094	P	putative cytochrome oxidase maturation protein, cbb3-type	6	28		7.20459e-25	4.66667
rho	CJSA_1096zz	K	transcription termination factor Rho	59	114		8.19027e-05	1.9322
dnaX	CJSA_1097zz	L	DNA polymerase III subunits gamma and tau	17	39		3.96337e-06	2.29412
-	CJSA_1100aaa		putative heavy-metal-associated domain protein	14	50		1.54358e-14	3.57143
-	CJSA_1101aaa	P	cation efflux family protein	41	77		0.00121091	1.87805
-	CJSA_1104	S	hypothetical protein	8	25		4.15583e-11	3.125
omp50	CJSA_1108		50 kda outer membrane protein precursor	112	172		0.0196426	1.53571
-	CJSA_1111bbb	P	SMR family multidrug efflux pump	5	25		1.31614e-21	5
-	CJSA_1112bbb	P	SMR family multidrug efflux pump	5	34		7.35694e-41	6.8
-	CJSA_1116ccc		hypothetical protein	59	99		0.000608051	1.67797
fliR	CJSA_1117ccc	NU	flagellar biosynthesis protein FliR	3	47		0	15.6667
-	CJSA_1118ccc	V	ABC transporter ATP-binding protein	33	128		5.42076e-24	3.87879
rpsB	CJSA_1120ccc'	J	30S ribosomal protein S2	374	750		0.00474122	2.00535
cfa	CJSA_1121	M	cyclopropane-fatty-acyl-phospholipid synthase	57	135		4.53918e-07	2.36842
gidA	CJSA_1126	D	tRNA uridine 5-carboxymethylaminomethyl modification protein GidA	34	52		0.0108208	1.52941
-	CJSA_1129	T	putative PAS domain containing signal-transduction sensor protein	24	137		2.14685e-68	5.70833
-	CJSA_1131		hypothetical protein	5	26		4.56125e-35	5.2
pyrC2	CJSA_1133	F	dihydroorotase	21	33		0.0141885	1.57143
atpB	CJSA_1142	C	F0F1 ATP synthase subunit A	67	176		5.47096e-08	2.62687
-	CJSA_1146ddd	H	putative 5-formyltetrahydrofolate cyclo-ligase family protein	14	57		4.14683e-30	4.07143
-	CJSA_1147ddd	R	phosphodiesterase	54	103		7.20073e-05	1.90741
-	CJSA_1148ddd	S	DedA family protein	18	37		6.68685e-06	2.05556
-	CJSA_1153	M	peptidase, M23/M37 family	37	56		0.0409286	1.51351
-	CJSA_1162	P	hemerythrin family non-heme iron protein	63	93		0.0501594	1.47619
cbpA	CJSA_1167eee	O	co-chaperone protein DnaJ	107	344		1.20753e-15	3.21495
hspR	CJSA_1168eee	K	heat shock transcriptional regulator	176	322		0.0004803	1.82955
kefB	CJSA_1169eee	P	putative glutathione-regulated potassium-efflux system protein	24	59		4.38971e-07	2.45833
-	CJSA_1180		hypothetical protein	470	3330		2.09768e-69	7.08511
hemE	CJSA_1181	H	uroporphyrinogen decarboxylase	116	188		0.00211167	1.62069
uvrC	CJSA_1184fff	L	excinuclease ABC subunit C	7	31		6.05034e-27	4.42857
-	CJSA_1185fff		hypothetical protein	1	29		0	29
-	CJSA_1186		hypothetical protein	26	102		2.53134e-19	3.92308
-	CJSA_1188	D	hypothetical protein	16	25		0.0201062	1.5625
purD	CJSA_1189ggg	F	phosphoribosylamine--glycine ligase	268	451		0.0244185	1.68284
-	CJSA_1190ggg	S	hypothetical protein	78	161		0.000161435	2.0641
-	CJSA_1191ggg	M	hypothetical protein	26	77		2.0061e-10	2.96154
-	CJSA_1194	R	putative isomerase	13	56		1.90801e-22	4.30769
racS	CJSA_1201	T	two-component sensor (histidine kinase)	42	83		0.000220293	1.97619
-	CJSA_1215		hypothetical protein	4	25		2.51497e-55	6.25
-	CJSA_1219	J	putative ribosomal pseudouridine synthase	34	78		1.42748e-05	2.29412
ktrB	CJSA_1221hhh	P	putative K+ uptake protein	5	29		8.60596e-54	5.8
ktrA	CJSA_1222hhh	P	putative K+ uptake protein	15	25		0.00158601	1.66667
pseB	CJSA_1231iii	MG	UDP-GlcNAc-specific C4,6 dehydratase/C5 epimerase	301	729		0.000237148	2.42193
pseC	CJSA_1232iii	M	C4 aminotransferase specific for PseB product	102	318		1.40651e-13	3.11765
-	CJSA_1233iii	R	hypothetical protein	22	85		4.43367e-19	3.86364
acpP2	CJSA_1237iii'	IQ	putative acyl carrier protein	48	83		0.000687466	1.72917
-	CJSA_1245	Q	putative amino acid activating enzyme	22	34		0.0347231	1.54545
-	CJSA_1248		hypothetical protein	36	60		0.00824361	1.66667
hisF	CJSA_1252	E	imidazole glycerol phosphate synthase subunit HisF	78	117		0.0212468	1.5
maf1	CJSA_1256	S	motility accessory factor	19	63		1.94088e-13	3.31579
-	CJSA_1262jjj	J	putative methyltransferase	24	69		8.64889e-13	2.875
neuB2	CJSA_1263jjj	M	N-acetylneuraminate synthase	95	403		6.58359e-29	4.24211
neuC2	CJSA_1264jjj	M	putative UDP-N-acetylglucosamine 2-epimerase	13	78		1.06727e-64	6
-	CJSA_1265jjj	MJ	putative sugar-phosphate nucleotide transferase	12	40		5.52985e-19	3.33333
-	CJSA_1266jjj	R	hypothetical protein	24	99		5.41507e-26	4.125
ptmB	CJSA_1267jjj	M	cylneuraminate cytidylyltransferase (flagellin modification)	122	316		1.5226e-09	2.59016
ptmA	CJSA_1268jjj	IQ	flagellin modification protein A	94	178		0.000150912	1.89362
maf3	CJSA_1270jjj'	S	motility accessory factor	15	25		0.0122354	1.66667
maf4	CJSA_1271jjj	S	motility accessory factor	18	63		2.96107e-15	3.5
dxr	CJSA_1281kkk	I	1-deoxy-D-xylulose 5-phosphate reductoisomerase	41	79		0.000501272	1.92683
cdsA	CJSA_1282kkk	I	phosphatidate cytidylyltransferase	55	110		0.000191427	2
-	CJSA_1283kkk		putative coiled-coil protein	104	262		2.89097e-07	2.51923
-	CJSA_1291		hypothetical protein	46	101		1.27321e-05	2.19565
nrfA	CJSA_1292lll	P	putative periplasmic cytochrome C	37	140		6.8585e-20	3.78378
nrfH	CJSA_1293lll	C	putative periplasmic cytochrome C	16	177		6.62532e-294	11.0625
ruvB	CJSA_1296	L	Holliday junction DNA helicase RuvB	19	42		7.57565e-07	2.21053
-	CJSA_1301	O	putative nucleotidyltransferase	13	27		8.52731e-05	2.07692
-	CJSA_1302	HR	hypothetical protein	69	102		0.0135551	1.47826
-	CJSA_1304mmm	R	putative nucleotide phosphoribosyltransferase	26	39		0.00963894	1.5
-	CJSA_1305mmm	M	putative periplasmic protein (VacJ-like protein)	24	37		0.0108356	1.54167
-	CJSA_1306mmm	Q	putative periplasmic toluene tolerance protein	10	25		2.31402e-07	2.5
-	CJSA_1308	F	RdgB/HAM1 family non-canonical purine NTP pyrophosphatase	9	40		3.03849e-23	4.44444
selA	CJSA_1312	E	selenocysteine synthase	16	25		0.00996117	1.5625
-	CJSA_1317nnn		hypothetical protein	4	46		1.42171e-216	11.5
-	CJSA_1318nnn	S	hypothetical protein	41	169		9.57077e-30	4.12195
katA	CJSA_1319ooo	P	catalase	76	405		3.05517e-46	5.32895
-	CJSA_1320ooo	R	ankyrin repeat-containing protein	10	92		4.04238e-144	9.2
-	CJSA_1321	S	helix-turn-helix containing protein	17	39		2.58344e-07	2.29412
-	CJSA_1328	P	putative ferrous iron transport protein	15	52		2.21176e-15	3.46667
-	CJSA_1343ppp		hypothetical protein	9	57		2.18881e-70	6.33333
kpsS	CJSA_1344ppp	M	capsule polysaccharide export protein KpsS	11	48		4.84453e-32	4.36364
-	CJSA_1348	R	putative amidotransferase	17	43		1.50464e-09	2.52941
-	CJSA_1354qqq		capsular polysaccharide biosynthesis protein	9	42		1.05829e-32	4.66667
-	CJSA_1355qqq		capsule biosynthesis phosphatase	85	145		0.00675851	1.70588
-	CJSA_1361qqq'	R	HAD superfamily hydrolase	8	46		3.40314e-49	5.75
-	CJSA_1362qqq	C	hypothetical protein	12	48		2.16609e-25	4
kpsT	CJSA_1371rrr	GM	capsular polysaccharide ABC transporter ATP-binding protein	49	143		7.0318e-10	2.91837
kpsM	CJSA_1372rrr	GM	capsular polysaccharide ABC transporter permease	47	80		0.00628662	1.70213
-	CJSA_1374		putative ATP/GTP-binding protein	478	941		0.00727887	1.96862
-	CJSA_1376		hypothetical protein	6	28		9.51637e-22	4.66667
prfB	CJSA_1379	J	peptide chain release factor 2	30	56		0.00192959	1.86667
thiL	CJSA_1382	H	thiamine monophosphate kinase	7	27		3.84257e-20	3.85714
-	CJSA_1383		hypothetical protein	27	48		0.00491137	1.77778
flgI	CJSA_1386sss	N	lagellar basal body P-ring protein	218	627		8.79361e-06	2.87615
-	CJSA_1387sss		hypothetical protein	89	441		4.38446e-34	4.95506
-	CJSA_1389sss'		hypothetical protein	572	2299		8.03856e-12	4.01923
flgK	CJSA_1390sss	N	flagellar hook-associated protein FlgK	127	571		3.80357e-15	4.49606
-	CJSA_1391sss		hypothetical protein	8	36		1.79435e-28	4.5
-	CJSA_1392sss	R	hypothetical protein	12	28		3.10013e-08	2.33333
ctsR	CJSA_1398		hypothetical protein	18	38		4.50871e-05	2.11111
-	CJSA_1406		putative lipoprotein	20	43		2.74779e-06	2.15
-	CJSA_1415ttt	T	putative two-component sensor	47	101		3.06845e-05	2.14894
-	CJSA_1416ttt	S	hypothetical protein	14	33		6.95306e-08	2.35714
carA	CJSA_1417ttt	EF	carbamoyl phosphate synthase small subunit	103	191		0.00019991	1.85437
-	CJSA_1418ttt	S	hypothetical protein	77	235		1.49158e-11	3.05195
-	CJSA_1419ttt	S	hypothetical protein	56	87		0.0288609	1.55357
-	CJSA_1422uuu	R	putative inner membrane protein	16	27		0.00351661	1.6875
-	CJSA_1423uuu	O	hypothetical protein	16	37		1.39196e-05	2.3125
selD	CJSA_1426	E	putative selenide,water dikinase	27	51		0.000649994	1.88889
-	CJSA_1427	O	putative two-component response regulator (SirA-like protein)	31	87		1.10424e-11	2.80645
-	CJSA_1434vvv		Tat pathway signal sequence domain-containing protein	185	402		3.94944e-05	2.17297
-	CJSA_1435vvv	R	hypothetical protein	56	291		5.18991e-38	5.19643
dapF	CJSA_1447www	E	diaminopimelate epimerase	39	86		4.09549e-05	2.20513
-	CJSA_1448www	R	hypothetical protein	12	31		9.43539e-10	2.58333
-	CJSA_1449	R	putative helix-turn-helix containing protein	30	165		7.55481e-42	5.5
-	CJSA_1462xxx	K	putative transcriptional regulator	6	29		5.61765e-21	4.83333
-	CJSA_1463xxx	M	Blc protein-like protein	7	25		6.74758e-14	3.57143
-	CJSA_1471	K	putative transcriptional regulator	6	57		1.06155e-100	9.5
pflA	CJSA_1477		paralysed flagellum protein	8	27		5.86709e-16	3.375
-	CJSA_1486		hypothetical protein	25	37		0.0203465	1.48
nuoA	CJSA_1491	C	NADH dehydrogenase I subunit A	36	90		3.26849e-09	2.5
-	CJSA_1496	E	putative peptide ABC-transport system periplasmic peptide-binding protein	13	32		1.30875e-08	2.46154
infA	CJSA_1502	J	translation initiation factor IF-1	32	94		5.01289e-12	2.9375
rpmJ	CJSA_1503yyy		50S ribosomal protein L36	466	1058		6.39113e-06	2.27039
rpsM	CJSA_1504yyy	J	30S ribosomal protein S13	448	775		0.00580589	1.72991
rpsK	CJSA_1505yyy	J	30S ribosomal protein S11	461	862		0.00569115	1.86985
-	CJSA_1525	P	putative pyridoxamine 5-phosphate oxidase	201	350		0.00292435	1.74129
chuA	CJSA_1526zzz	P	hemin uptake system outer membrane receptor	32	74		1.25432e-06	2.3125
chuB	CJSA_1527zzz	P	putative hemin uptake system permease protein	14	39		3.25553e-12	2.78571
chuD	CJSA_1529zzz'	P	putative hemin uptake system periplasmic hemin-binding protein	10	28		3.35822e-11	2.8
-	CJSA_1533		hypothetical protein	14	31		6.98193e-07	2.21429
ribD	CJSA_1534^	H	riboflavin-specific deaminase/reductase	3	100		0	33.3333
-	CJSA_1535^		hypothetical protein	2	29		8.44755e-229	14.5
exbB2	CJSA_1540*	U	exbB/tolQ family transport protein	59	112		0.000574635	1.89831
exbD2	CJSA_1541*	U	exbB/tolQ family transport protein	20	52		1.56374e-09	2.6
-	CJSA_1544		hypothetical protein	26	174		1.15744e-70	6.69231
rnhA	CJSA_1548#	L	ribonuclease H	24	35		0.0184631	1.45833
-	CJSA_1549#	G	hypothetical protein	5	46		4.19171e-119	9.2
dnaG	CJSA_1550	L	DNA primase	17	37		2.73189e-05	2.17647
-	CJSA_1552		hypothetical protein	18	60		6.22473e-19	3.33333
-	CJSA_1554	S	hypothetical protein	44	102		2.94236e-07	2.31818
-	CJSA_1560	Q	putative ABC transport system periplasmic substrate-binding protein	8	26		7.87167e-14	3.25
-	CJSA_1562		hypothetical protein	77	343		3.113e-27	4.45455
murL	CJSA_1564^^	M	glutamate racemase	11	28		2.06592e-08	2.54545
nlpC	CJSA_1565^^	M	putative lipoprotein nlpC	33	60		0.000552602	1.81818
nhaA2	CJSA_1566^^	P	Na+/H+ antiporter	32	98		1.70405e-11	3.0625
nhaA1	CJSA_1567^^	P	Na+/H+ antiporter	25	251		9.62993e-182	10.04
-	CJSA_1579		hypothetical protein	26	165		1.02648e-83	6.34615
-	CJSA_1590		hypothetical protein	11	25		1.52616e-06	2.27273
-	CJSA_1596	G	putative MSF family efflux protein	23	93		1.21849e-21	4.04348
rplW	CJSA_1614**	J	50S ribosomal protein L23	259	487		0.000165961	1.88031
rplC	CJSA_1616**'	J	50S ribosomal protein L3	279	477		0.00602589	1.70968
rpsJ	CJSA_1617**	J	30S ribosomal protein S10	293	576		2.0194e-05	1.96587
ksgA	CJSA_1620	J	dimethyladenosine transferase	44	130		3.55791e-10	2.95455
-	CJSA_1621	F	hypothetical protein	8	27		2.63573e-12	3.375
-	CJSA_1624	R	GNAT family acetyltransferase	15	110		6.5962e-112	7.33333
-	CJSA_1631	R	putative GTP cyclohydrolase I	12	167		0	13.9167
-	CJSA_pVir0013		hypothetical protein	6	55		2.492e-103	9.16667
-	CJSA_pVir0016		hypothetical protein	12	31		2.35934e-08	2.58333
-	CJSA_pVir0020		hypothetical protein	14	25		0.00291191	1.78571
-	CJSA_pVir0024##		putative plasmid partioning ParA protein	33	135		1.89848e-26	4.09091
-	CJSA_pVir0025##		hypothetical protein	19	103		1.67581e-55	5.42105
repE	CJSA_pVir0026		putative replication protein RepE	26	283		1.0293e-263	10.8846
-	CJSA_pVir0032		hypothetical protein	18	33		0.000313342	1.83333
-	CJSA_pVir0034		hypothetical protein	1	47		0	47
-	CJSA_pVir0040^^		hypothetical protein	11	89		1.00265e-82	8.09091
-	CJSA_pVir0041^^		hypothetical protein	27	138		3.21413e-35	5.11111
-	CJSA_pVir0042		hypothetical protein	8	124		0	15.5
-	CJSA_pVir0044		hypothetical protein	5	112		0	22.4
-	CJSA_pVir0045***		hypothetical protein	66	178		1.05259e-10	2.69697
-	CJSA_pVir0046***		putative RelE/StbE family addiction module toxin	16	55		1.72994e-13	3.4375
rnpB	CJSA_CjrnpB1		-	22	166		3.38278e-110	7.54545
-	CJSA_t0001		Ala tRNA	27	217		2.95314e-85	8.03704
-	CJSA_t0002		Ile tRNA	49	463		9.11531e-155	9.44898
-	CJSA_t0004		Ala tRNA	35	206		8.18515e-48	5.88571
-	CJSA_t0005		Ile tRNA	49	461		8.98336e-153	9.40816
-	CJSA_t0006		Thr tRNA	97	306		3.04608e-14	3.15464
-	CJSA_t0008		Gly tRNA	1429	2162		0.00466455	1.51295
-	CJSA_t0009		Thr tRNA	590	1716		3.36656e-10	2.90847
-	CJSA_t0011		Arg tRNA	92	248		6.74959e-10	2.69565
-	CJSA_t0012		Met tRNA	25	111		3.33916e-21	4.44
-	CJSA_t0014		Ala tRNA	34	213		2.68038e-53	6.26471
-	CJSA_t0015		Ile tRNA	51	422		2.71092e-115	8.27451
-	CJSA_t0018		Leu tRNA	43	69		0.0267887	1.60465
-	CJSA_t0019		Asp tRNA	25	172		5.01917e-56	6.88
-	CJSA_t0020		Val tRNA	46	167		3.96094e-16	3.63043
-	CJSA_t0021		Arg tRNA	243	529		1.50669e-06	2.17695
-	CJSA_t0022		Lys tRNA	223	589		2.38793e-10	2.64126
-	CJSA_t0023		Val tRNA	64	301		1.79513e-29	4.70312
-	CJSA_t0024		Lys tRNA	29	125		9.09273e-20	4.31034
-	CJSA_t0032		Gly tRNA	144	210		0.0125127	1.45833
-	CJSA_t0033		Leu tRNA	418	745		0.00297839	1.7823
-	CJSA_t0034		Cys tRNA	255	865		1.2345e-18	3.39216
-	CJSA_t0035		Ser tRNA	81	343		3.2434e-28	4.23457
-	CJSA_t0037		Arg tRNA	318	610		0.00032559	1.91824
-	CJSA_t0038		Arg tRNA	583	1123		0.000496485	1.92624
-	CJSA_t0040		Pro tRNA	81	139		0.00271981	1.71605
-	CJSA_t0041		Met tRNA	2	41		0	20.5
-	CJSA_t0043		Ala tRNA	19	73		8.68267e-18	3.84211
-	CJSA_t0044		Val tRNA	53	260		1.02666e-33	4.90566
-	predicted RNA		99nt length; 250059 to 249960 negative strand	94	139		0.0113429	1.47872
-	predicted RNA		109nt length; 815016 to 815125 positive strand	52	77		0.0460431	1.48077
-	predicted RNA		825nt length; 1047424 to 1046599 negative strand	276	437		0.0460431	1.58333
-	predicted RNA		antisense: CJSA_0417; 44nt length, 419785 to 419741 negative strand	99	160		0.0206738	1.61616
-	predicted RNA		266nt length; 1630649 to 1630383 negative strand	187	310		0.00730318	1.65775
-	predicted RNA		54nt length; 388170 to 388224 positive strand	112	209		0.000608051	1.86607
-	predicted RNA		antisense: prfA; 96nt length, 1537068 to 1536972 negative strand	86	163		0.000105742	1.89535
-	predicted RNA		109nt length; 1630884 to 1630775 negative strand	117	237		2.05814e-05	2.02564
-	predicted RNA		antisense: CJSA_0136; 16nt length, 150574 to 150558 negative strand	65	140		7.03976e-05	2.15385
-	predicted RNA		34nt length; 1522668 to 1522702 positive strand	44	98		9.21723e-05	2.22727
-	predicted RNA		42nt length; 735002 to 735044 positive strand	26	60		1.96337e-05	2.30769
-	predicted RNA		39nt length; 1113972 to 1113933 negative strand	216	520		1.99246e-08	2.40741
-	predicted RNA		283nt length; 1046498 to 1046215 negative strand	80	212		1.36613e-09	2.65
-	predicted RNA		61nt length; 809228 to 809167 negative strand	59	197		9.18587e-14	3.33898
-	predicted RNA		269nt length; 1555790 to 1555521 negative strand	95	326		1.3079e-15	3.43158
-	predicted RNA		101nt length; 726401 to 726300 negative strand	179	637		5.15709e-21	3.55866
-	predicted RNA		18nt length; 1463578 to 1463560 negative strand	22	80		8.40191e-14	3.63636
-	predicted RNA		antisense: CJSA_0921; 93nt length, 915128 to 915221 positive strand	45	164		1.90026e-16	3.64444
-	predicted RNA		13nt length; 1153787 to 1153800 positive strand	1007	3802		5.14992e-24	3.77557
-	predicted RNA		antisense: dccS; 116nt length, 1155464 to 1155580 positive strand	76	290		4.5943e-25	3.81579
-	predicted RNA		antisense: CJSA_0401; 61nt length, 395623 to 395684 positive strand	149	569		1.77103e-25	3.81879
-	predicted RNA		11nt length; 914526 to 914537 positive strand	61	234		5.16623e-16	3.83607
-	predicted RNA		16nt length; 71942 to 71926 negative strand	77	311		7.59572e-21	4.03896
-	predicted RNA		31nt length; 1386282 to 1386313 positive strand	119	533		1.75955e-27	4.47899
-	predicted RNA		22nt length; 1053999 to 1053977 negative strand	46	219		9.11447e-31	4.76087
-	predicted RNA		711nt length; 197103 to 197814 positive strand	41	199		8.66807e-33	4.85366
-	predicted RNA		10nt length; 1163099 to 1163109 positive strand	55	296		5.41018e-34	5.38182
-	predicted RNA		antisense: CJSA_0390; 81nt length, 388537 to 388618 positive strand	41	233		5.15289e-46	5.68293
-	predicted RNA		antisense: CJSA_0363; 359nt length, 362675 to 362316 negative strand	72	412		2.66194e-51	5.72222
-	predicted RNA		antisense: CJSA_0223; 161nt length, 231589 to 231750	58	386		5.2969e-96	6.65517
-	predicted RNA		9nt length; 198494 to 198503 positive strand	18	121		5.46498e-56	6.72222
-	predicted RNA		70nt length; 1175070 to 1175140 positive strand	106	766		4.56412e-105	7.22642
-	predicted RNA		23nt length; 197874 to 197897 positive strand	13	102		3.59525e-66	7.84615
-	predicted RNA		antisense: fliP; 78nt length, 771731 to 771809 positive strand	15	119		1.26548e-96	7.93333
-	predicted RNA		69nt length; 210449 to 210518 positive strand	17	143		4.571e-105	8.41176
-	predicted RNA		antisense: ispG; 155nt length, 644706 to 644551 negative strand	32	272		2.39588e-118	8.5
-	predicted RNA		37nt length; 198556 to 198593 positive strand	16	144		3.6382e-110	9
-	predicted RNA		55nt length; 417148 to 417203 positive strand	20	185		3.49205e-145	9.25
-	predicted RNA		antisense: pbpA; 61nt length, 479304 to 479243 negative strand	14	131		5.8844e-132	9.35714
-	predicted RNA		129nt length; 1193304 to 1193433 positive strand	23	227		6.14218e-162	9.86957
-	predicted RNA		antisense: CJSA_0390; 14nt length, 388983 to 388997 positive strand	8	102		1.47992e-190	12.75
-	predicted RNA		antisense: CJSA_0826; 174nt length; 818541 to 818715 positive strand	13	166		1.74206e-273	12.7692
-	predicted RNA		20nt length; 409962 to 409982 positive strand	12	157		2.36903e-230	13.0833
-	predicted RNA		23nt length; 198048 to 198071 positive strand	10	135		1.74925e-253	13.5
-	predicted RNA		34nt length; 1555303 to 1555269 negative strand	11	149		5.98543e-282	13.5455
-	predicted RNA		35nt length; 1259305 to 1259340 positive strand	37	601		0	16.2432
-	predicted RNA		52nt length; 959493 to 959441 negative strand	9	168		0	18.6667
-	predicted RNA		94nt length; 1572367 to 1572461 positive strand	13	258		0	19.8462
-	predicted RNA		antisense: CJSA_0401; 33nt length, 395896 to 395929 positive strand	6	120		0	20
-	predicted RNA		10nt length; 1175229 to 1175929 positive strand	7	150		0	21.4286
-	predicted RNA		antisense: pseE; 274nt length, 1272527 to 1272253 negative strand	8	182		0	22.75
-	predicted RNA		antisense: glnA; 123nt length, 660916 to 661039 positive strand	8	185		0	23.125
-	predicted RNA		17nt length; 1465 to 1482 positive strand	6	140		0	23.3333
-	predicted RNA		19nt length; 59713 to 59732 positive strand	8	413		0	51.625
-	predicted RNA		18nt length; 706803 to 706821 positive strand	2	162		0	81
-	predicted RNA		13nt length; 645467 to 645454 negative strand	1	122		0	122
-	predicted RNA		24nt length; 828765 to 828741 negative strand	2	245		0	122.5
-	predicted RNA		antisense: pseE; 69nt length, 1271969 to 1271900 negative strand	0	110		0	110
-	predicted RNA		25nt length; 31479 to 31504 positive strand pVir	47	108		2.29355e-05	2.29787
-	predicted RNA		antisense: CJSA_pVir0033; 168 length, 25244 to 25412 positive strand pVir	208	542		7.0599e-08	2.60577
a, b, aa, bb, ect = matching superscript signifies expression within the same operon
a', b', aa', bb', etc = skips a gene within an operon

## Sheet: S3-Sheep 2 hr genes diff exp
Supplementary Table S3. Genes with demonstrated significant changes in expression, 2 hour gallbladder exposure
				Expression (RPKM)			Significance
Name	Synonym	COG Code	Product	Plate 16 hr	GB in vivo 2 hr		Q Value	Fold change
DECREASED EXPRESSION AT 2 HOURS EXPOSURE TO GALLBLADDER
-	CJSA_0016	R	ExsB protein	55	27		0.00408334	-2.03704
-	CJSA_0025	R	sodium/dicarboxylate symporter	151	21		1.54055e-83	-7.19048
-	CJSA_0037	C	cytochrome c family protein	239	94		3.49885e-05	-2.54255
-	CJSA_0067	C	iron-sulfur cluster binding protein	1024	464		0.0217631	-2.2069
-	CJSA_0068	C	putative oxidoreductase iron-sulfur subunit	991	348		7.45272e-05	-2.8477
lctP	CJSA_0069	C	L-lactate permease	1674	513		3.05104e-05	-3.26316
trxB	CJSA_0137	O	thioredoxin-disulfide reductase	564	254		0.00482392	-2.22047
trxA	CJSA_0138	O	thioredoxin	2059	1065		0.0196648	-1.93333
-	CJSA_0158		hypothetical protein	1356	626		0.00247689	-2.16613
-	CJSA_0165	P	iron ABC transporter periplasmic iron-binding protein	1000	467		0.0168787	-2.14133
-	CJSA_0190		hypothetical protein	1124	489		0.00232551	-2.29857
-	CJSA_0216	C	NifU family protein	790	313		0.000644717	-2.52396
iscS	CJSA_0217	E	cysteine desulfurase	517	207		0.000967138	-2.49758
panD	CJSA_0270	H	aspartate alpha-decarboxylase	116	55		0.00144819	-2.10909
panC	CJSA_0271	H	pantoate--beta-alanine ligase	156	67		0.00108635	-2.32836
panB	CJSA_0272	H	3-methyl-2-oxobutanoate	197	96		0.00845228	-2.05208
modA	CJSA_0277	P	molybdate transport system substrate-binding protein	207	60		4.58202e-12	-3.45
fdxA	CJSA_0307	C	ferredoxin, 4Fe-4S	2211	1232		0.0407201	-1.79464
mqo	CJSA_0366	R	putative malate:quinone oxidoreductase	202	95		0.00819601	-2.12632
-	CJSA_0387		putative oxidoreductase subunit	202	102		0.0209789	-1.98039
-	CJSA_0388	E	putative GMC oxidoreductase subunit	248	106		0.0017385	-2.33962
-	CJSA_0396	S	putative acidic periplasmic protein	46	25		0.0474025	-1.84
-	CJSA_0398	R	ABC transporter ATP-binding protein	189	68		1.80956e-06	-2.77941
-	CJSA_0399		hypothetical protein	721	213		1.84219e-11	-3.38498
dapA	CJSA_0451	EM	dihydrodipicolinate synthase	74	30		2.60559e-05	-2.46667
uxaA	CJSA_0452	G	putative altronate hydrolase N-terminus	79	25		1.99003e-06	-3.16
uxaA	CJSA_0453	G	putative altronate hydrolase C-terminus	79	25		7.25297e-10	-3.16
icd	CJSA_0498	C	isocitrate dehydrogenase	980	295		4.59888e-05	-3.32203
mdh	CJSA_0499	C	malate dehydrogenase	413	207		0.032248	-1.99517
sucC	CJSA_0500	C	succinyl-coA synthetase beta chain	919	479		0.0509543	-1.91858
sucD	CJSA_0501	C	succinyl-coA synthetase alpha chain	824	428		0.0302736	-1.92523
-	CJSA_0519	S	hypothetical protein	123	45		6.01104e-07	-2.73333
-	CJSA_0520	S	hypothetical protein	95	21		4.01241e-27	-4.52381
-	CJSA_0521		hypothetical protein	140	37		3.11078e-15	-3.78378
-	CJSA_0522	P	putative dicarboxylate carrier protein MatC	25	13		0.0233004	-1.92308
-	CJSA_0526	O	pyridine nucleotide-disulfide oxidoreductase family protein	512	174		7.06813e-06	-2.94253
cft	CJSA_0580	P	ferritin	769	343		0.00381408	-2.24198
-	CJSA_0620	E	M24 family peptidase	410	110		1.07513e-08	-3.72727
-	CJSA_0621	E	MFS di-/tripeptide transporter	183	30		7.34833e-48	-6.1
pta	CJSA_0652	C	phosphate acetyltransferase	314	89		1.6445e-10	-3.52809
ackA	CJSA_0653	C	acetate kinase	386	133		6.81474e-06	-2.90226
glnA	CJSA_0663	E	glutamine synthetase, type I	463	169		0.000200239	-2.73964
flaC	CJSA_0684	N	flagellin subunit protein FlaC	1182	379		7.38379e-06	-3.11873
-	CJSA_0685		hypothetical protein	109	51		0.000967138	-2.13725
cfrA	CJSA_0712	P	ferric enterobactin uptake receptor	22	11		0.00227156	-2
aspB	CJSA_0718	E	aspartate transaminase	209	84		5.59182e-05	-2.4881
tpx	CJSA_0735	O	thiol peroxidase	4271	1669		0.0032834	-2.55902
acnB	CJSA_0790	C	bifunctional aconitate hydratase 2/2-methylisocitrate dehydratase	793	231		6.99284e-06	-3.4329
thiJ	CJSA_0845	R	4-methyl-5(beta-hydroxyethyl)-thiazole monophosphate synthesis protein	270	145		0.049321	-1.86207
-	CJSA_0849	E	putative amino-acid transport protein	461	160		6.66376e-05	-2.88125
hupB	CJSA_0858	L	DNA-binding protein HU-like protein	5807	2410		0.0101926	-2.40954
-	CJSA_0861	S	hypothetical protein	147	27		1.38528e-26	-5.44444
cstA	CJSA_0862	T	carbon starvation protein A	293	47		1.96538e-46	-6.23404
-	CJSA_0865	E	amino acid ABC transporter permease	594	221		6.58249e-05	-2.68778
peb1A	CJSA_0866	ET	bifunctional adhesin/ABC transporter aspartate/glutamate-binding protein	3087	815		5.63491e-07	-3.78773
pebC	CJSA_0867	E	amino acid ABC transporter ATP-binding protein	584	152		2.90026e-15	-3.84211
-	CJSA_0880	R	putative sodium:amino-acid symporter family protein	22	9		0.00010086	-2.44444
cjaA	CJSA_0925	ET	putative amino-acid transporter periplasmic solute-binding protein	1299	244		2.69851e-19	-5.32377
hipO	CJSA_0928	R	hippurate hydrolase	90	31		1.26576e-07	-2.90323
-	CJSA_0930	P	putative MFS (Major Facilitator Superfamily) transport protein	75	14		5.25185e-35	-5.35714
livJ	CJSA_0962	E	high affinity branched-chain amino acid ABC transporter periplasmic amino acid-binding protein	185	97		0.0200728	-1.90722
ldh	CJSA_1105	C	L-lactate dehydrogenase	30	15		0.018676	-2
cetB	CJSA_1127	T	bipartate energy taxis response protein cetB	314	144		0.00214478	-2.18056
cetA	CJSA_1128	NT	bipartate energy taxis response protein cetA	433	231		0.0224699	-1.87446
dctA	CJSA_1130	C	C4-dicarboxylate transport protein	152	81		0.0257216	-1.87654
luxS	CJSA_1136	T	S-ribosylhomocysteinase	878	470		0.0355468	-1.86809
-	CJSA_1137	R	2OG-Fe(II) oxygenase	196	68		1.21234e-07	-2.88235
-	CJSA_1138	P	putative NLPA family lipoprotein	156	43		2.8675e-14	-3.62791
metE	CJSA_1139	E	5-methyltetrahydropteroyltriglutamate/homocysteine S-methyltransferase	140	42		1.24629e-09	-3.33333
metF	CJSA_1140	E	5,10-methylenetetrahydrofolate reductase	38	14		4.67023e-06	-2.71429
htrA	CJSA_1166	O	serine protease (protease DO)	319	117		4.74283e-05	-2.7265
porA	CJSA_1198		major outer membrane protein	17699	9388		0.0420904	-1.88528
hydC	CJSA_1204	C	Ni/Fe-hydrogenase B-type cytochrome subunit	635	345		0.039734	-1.84058
hydB	CJSA_1205	C	Ni/Fe-hydrogenase large subunit	920	457		0.0509978	-2.01313
hydA	CJSA_1206	C	Ni/Fe-hydrogenase small chain	771	358		0.0155152	-2.15363
ceuE	CJSA_1290	P	enterochelin ABC transporter, periplasmic enterochelin-binding protein	50	20		5.96878e-06	-2.5
fldA	CJSA_1316	C	lavodoxin FldA	1818	676		0.000299359	-2.68935
-	CJSA_1318	S	hypothetical protein	41	11		6.9646e-08	-3.72727
-	CJSA_1322	J	putative endoribonuclease L-PSP	477	56		2.48176e-133	-8.51786
-	CJSA_1388		hypothetical protein	3197	1627		0.0153311	-1.96497
cadF	CJSA_1401	M	outer membrane fibronectin-binding protein	645	368		0.049321	-1.75272
rpsl	CJSA_1402	J	30S ribosomal protein S9	248	125		0.027674	-1.984
putP	CJSA_1424	ER	putative sodium/proline permease	451	95		4.95446e-19	-4.74737
putA	CJSA_1425	C	putative proline dehydrogenase/delta-1-pyrroline-5-carboxylate dehydrogenase	399	67		1.55661e-23	-5.95522
fdhD	CJSA_1430	C	formate dehydrogenase accessory protein	314	137		0.000527538	-2.29197
-	CJSA_1437	Q	putative periplasmic oxidoreductase	255	123		0.014259	-2.07317
acs	CJSA_1453	I	acetyl-coenzyme A synthetase	406	69		2.68689e-32	-5.88406
-	CJSA_1456	H	putative tungsten ABC-transport system periplamic substrate binding protein	450	216		0.0224917	-2.08333
-	CJSA_1457	R	hypothetical protein	115	40		1.45091e-07	-2.875
-	CJSA_1458	E	putative allophanate hydrolase subunit 1	79	33		2.37652e-05	-2.39394
-	CJSA_1459	E	putative allophanate hydrolase subunit 2	50	22		0.000184448	-2.27273
-	CJSA_1470	R	hypothetical protein	38	17		0.00557936	-2.23529
-	CJSA_1525	P	putative pyridoxamine 5-phosphate oxidase	201	63		1.25454e-09	-3.19048
chuA	CJSA_1526	P	hemin uptake system outer membrane receptor	32	6		5.08598e-36	-5.33333
kgtP	CJSA_1531	G	alpha-ketoglutarate permease	364	134		5.30579e-05	-2.71642
sdaA	CJSA_1536	E	L-serine dehydratase	533	225		0.00174604	-2.36889
sdaC	CJSA_1537	E	amino acid transporter	397	201		0.0162987	-1.97512
exbB2	CJSA_1540	U	exbB/tolQ family transport protein	59	26		0.00237415	-2.26923
p19	CJSA_1570	P	periplasmic protein p19	1423	468		1.56359e-05	-3.0406
-	CJSA_1571	S	hypothetical protein	34	16		0.000701486	-2.125
-	CJSA_1572	M	ABC transporter permease	54	22		2.69276e-05	-2.45455
-	CJSA_1573	M	ABC transporter permease	35	17		0.00228962	-2.05882
-	CJSA_1574	V	ABC transporter ATP-binding protein	98	44		0.000477264	-2.22727
-	CJSA_1575	OC	putative periplasmic thiredoxin	65	35		0.0225324	-1.85714
gltA	CJSA_1592	C	citrate synthase	1082	246		2.42267e-12	-4.39837
virB8	CJSA_pVir0001		virulence protein	21	7		0.000810617	-3
virB9	CJSA_pVir0002		VirB9	37	10		3.63231e-11	-3.7
virB10	CJSA_pVir0003		VirB10	23	9		6.14584e-05	-2.55556
-	CJSA_pVir0008		hypothetical protein	644	153		9.94975e-23	-4.20915
-	CJSA_pVir0009		hypothetical protein	1372	359		4.52745e-09	-3.82173
-	CJSA_pVir0050		hypothetical protein	128	19		1.09687e-41	-6.73684
-	CJSA_pVir0051		hypothetical protein	40	8		8.96855e-19	-5
-	CJSA_CjSRP1		SRP RNA	18640	2912		3.04192e-29	-6.4011
-	CJSA_t0016		Leu tRNA	86	35		0.00939137	-2.45714
-	CJSA_t0030		Ser tRNA	436	59		1.16574e-56	-7.38983
-	CJSA_t0031		Sec tRNA	216	96		0.00821135	-2.25
-	CJSA_t0042		Ser tRNA	42	15		5.87162e-05	-2.8
-	predicted RNA		176 nt length; 1331258 to 1331434 positive strand	198	30		7.45032e-42	-6.6
-	predicted RNA		106 nt length; 1331076 to 1331182 positive strand	233	40		4.12646e-29	-5.825
-	predicted RNA		13nt length; 1183928 to 1183941 positive strand	961	170		4.59924e-28	-5.65294
-	predicted RNA		10nt length; 1134343 to 1134353 positive strand	122	34		1.12782e-16	-3.58824
-	predicted RNA		antisense: CJSA_1568; 87nt length, 15577262 to 1577349 positive strand	216	69		4.60214e-06	-3.13043
-	predicted RNA		9nt length; 1333562 to 1333571 positive strand	120	45		3.66598e-07	-2.66667
-	predicted RNA		antisense: groES; 20nt length, 1153731 to 1153711 negative strand	53	22		2.94873e-05	-2.40909
-	predicted RNA		antisense: CJSA_0192; 299nt length, 198809 to 199108 positive strand	1528	646		0.00136757	-2.36533
-	predicted RNA		antisense: glnQ; 86nt length, 845047 to 844961 negative strand	179	82		0.039327	-2.18293
-	predicted RNA		255 nt length; 1457504 to 1457759 positive strand	277	127		0.00155777	-2.1811
-	predicted RNA		21 nt length; 7622 to 7643 positive strand pVir	577	151		1.9223e-09	-3.82119
INCREASED EXPRESSION AT 2 HOURS EXPOSURE TO GALLBLADDER
dnaN	CJSA_0002	L	DNA polymerase III subunit beta	32	56		0.000325494	1.75
rnhB	CJSA_0010	L	ribonuclease HII	121	179		0.00384427	1.47934
dsbI	CJSA_0017	O	DsbB family disulfide bond formation protein	78	161		1.6386e-08	2.0641
dba	CJSA_0018		disulfide bond formation protein	46	139		5.55152e-22	3.02174
-	CJSA_0035	G	MFS family drug resistance transporter	15	52		3.33341e-33	3.46667
-	CJSA_0040		hypothetical protein	15	321		0	21.4
-	CJSA_0041		hypothetical protein	62	193		9.1096e-23	3.1129
flgD	CJSA_0042	N	flagellar basal body rod modification protein	309	465		0.0300294	1.50485
flgE	CJSA_0043	N	flagellar hook protein	160	309		0.000756964	1.93125
-	CJSA_0045	P	putative iron-binding protein	39	108		6.74083e-14	2.76923
-	CJSA_0049		hypothetical protein	53	100		2.75657e-05	1.88679
fliM	CJSA_0054	N	flagellar motor switch protein FliM	61	118		1.82742e-06	1.93443
fliA	CJSA_0055	K	flagellar biosynthesis sigma factor	77	157		1.41522e-06	2.03896
-	CJSA_0056		hypothetical protein	34	103		9.4544e-25	3.02941
flhF	CJSA_0058	N	flagellar biosynthesis regulator FlhF	31	45		0.0171556	1.45161
folK	CJSA_0059	H	2-amino-4-hydroxy-6-hydroxymethyldihydropteridine pyrophosphokinase	21	57		1.04564e-18	2.71429
-	CJSA_0061	FR	chlorohydrolase	13	35		9.39804e-16	2.69231
cdtC	CJSA_0070		cytolethal distending toxin C	19	43		5.76579e-11	2.26316
cdtB	CJSA_0071		cytolethal distending toxin B	57	87		0.00518778	1.52632
cydA	CJSA_0074	C	cytochrome d ubiquinol oxidase, subunit I	10	24		6.47707e-12	2.4
-	CJSA_0080	S	putative lipoprotein	36	64		0.000157963	1.77778
obgE	CJSA_0087	R	GTPase ObgE	40	61		0.00429844	1.525
-	CJSA_0092	K	ParB family chromosome partitioning protein	29	46		0.001596	1.58621
atpF'	CJSA_0093	C	F0F1 ATP synthase subunit B	67	179		3.93353e-13	2.67164
atpF	CJSA_0094	C	F0F1 ATP synthase subunit B	37	78		2.03266e-09	2.10811
atpG	CJSA_0097	C	F0F1 ATP synthase subunit gamma	92	141		0.000802025	1.53261
exbD3	CJSA_0101	U	putative exbD/tolR family transport protein	33	65		8.05975e-08	1.9697
-	CJSA_0102		TonB domain-containing protein	17	45		4.61415e-17	2.64706
-	CJSA_0105	S	hypothetical protein	147	369		1.28063e-11	2.5102
fabD	CJSA_0107	I	malonyl CoA-acyl carrier protein transacylase	232	377		0.0140122	1.625
mtnA	CJSA_0108	F	5'-methylthioadenosine/S-adenosylhomocysteine nucleosidase	155	297		2.8682e-07	1.91613
-	CJSA_0109	D	PP-loop family protein	144	269		9.22501e-07	1.86806
-	CJSA_0110	Q	putative pyrazinamidase/nicotinamidase	18	57		1.05786e-27	3.16667
-	CJSA_0111		putative recombination protein RecO	5	27		5.8082e-50	5.4
-	CJSA_0112	R	putative metalloprotease	17	53		7.07458e-23	3.11765
-	CJSA_0124	O	putative glycoprotease family protein	10	33		5.64924e-23	3.3
thrB	CJSA_0125	E	homoserine kinase	23	50		3.05171e-10	2.17391
-	CJSA_0126	K	hypothetical protein	19	48		8.00041e-12	2.52632
-	CJSA_0132	P	cation ABC transporter permease	15	24		0.000134807	1.6
-	CJSA_0133	P	cation ABC transporter ATP-binding protein	37	55		0.0117499	1.48649
-	CJSA_0143		hypothetical protein	56	86		0.00429844	1.53571
-	CJSA_0149	C	cytochrome c family protein	31	46		0.00181397	1.48387
-	CJSA_0150	H	putative 6-pyruvoyl tetrahydropterin synthase	53	93		0.000183992	1.75472
-	CJSA_0166		putative lipoprotein	14	67		4.09898e-41	4.78571
-	CJSA_0172	I	putative transporter	21	44		7.21445e-07	2.09524
-	CJSA_0180	O	Mg chelatase-like protein	20	30		0.00704989	1.5
-	CJSA_0192		hypothetical protein	46	116		1.62276e-15	2.52174
-	CJSA_0199	L	D12 class N6 adenine-specific DNA methyltransferase	8	22		2.96978e-17	2.75
argC	CJSA_0201	E	N-acetyl-gamma-glutamyl-phosphate reductase	55	80		0.00963148	1.45455
argD	CJSA_0204	E	acetylornithine aminotransferase	31	47		0.00520023	1.51613
-	CJSA_0207	H	nicotinate phosphoribosyltransferase	20	40		1.71552e-06	2
-	CJSA_0209	S	hypothetical protein	17	33		9.80091e-07	1.94118
-	CJSA_0227	G	major facilitator superfamily protein	31	50		0.00193252	1.6129
-	CJSA_0228		hypothetical protein	65	101		0.000252324	1.55385
-	CJSA_0233	R	sulfatase	14	41		2.49895e-20	2.92857
dgkA	CJSA_0234	M	diacylglycerol kinase	10	36		1.72268e-26	3.6
pyrC	CJSA_0236	F	dihydroorotase	13	30		1.61812e-11	2.30769
-	CJSA_0240	P	zinc transporter ZupT	12	30		1.31061e-14	2.5
mreC	CJSA_0254	M	rod shape-determining protein MreC	35	63		1.87022e-05	1.8
-	CJSA_0256	J	hypothetical protein	17	26		0.000594883	1.52941
tal	CJSA_0257	G	transaldolase	24	38		0.00100411	1.58333
lpxB	CJSA_0264	M	lipid-A-disaccharide synthase	34	54		0.00232633	1.58824
-	CJSA_0284	P	SMR family multidrug efflux pump	13	27		4.28234e-07	2.07692
rplY	CJSA_0285	J	50S ribosomal protein L25/general stress protein Ctc	369	570		0.0265635	1.54472
pth	CJSA_0286	J	peptidyl-tRNA hydrolase	85	161		1.71409e-05	1.89412
-	CJSA_0289	G	HAD family hydrolase	28	41		0.00192006	1.46429
dxs	CJSA_0295	HI	1-deoxy-D-xylulose-5-phosphate synthase	23	35		0.0086491	1.52174
ubiE	CJSA_0298	H	ubiquinone/menaquinone biosynthesis methyltransferase	15	25		4.12657e-05	1.66667
fabH	CJSA_0302	I	3-oxoacyl-ACP synthase	39	146		9.03572e-30	3.74359
plsX	CJSA_0303	I	putative glycerol-3-phosphate acyltransferase PlsX	116	283		1.47922e-12	2.43966
-	CJSA_0305		hypothetical protein	124	349		5.90771e-15	2.81452
ndk	CJSA_0306	F	nucleoside diphosphate kinase	455	805		0.00243543	1.76923
flhB	CJSA_0309	NU	flagellar biosynthesis protein FlhB	85	165		8.34226e-08	1.94118
trpE	CJSA_0319	EH	anthranilate synthase component I	41	68		0.0010454	1.65854
trpD	CJSA_0320	E	anthranilate synthase component II	56	90		9.53835e-05	1.60714
trpF	CJSA_0321	E	N-(5phosphoribosyl)anthranilate isomerase	23	42		1.71552e-06	1.82609
-	CJSA_0326		putative transmembrane protein	11	24		2.21694e-09	2.18182
-	CJSA_0327	FP	Ppx/GppA family phosphatase	24	42		0.000263889	1.75
fdxB	CJSA_0328	C	ferredoxin, 4Fe-4S	102	167		0.000577141	1.63725
cmeC	CJSA_0338	MU	RND efflux system, outer membrane lipoprotein CmeC	62	164		1.17619e-16	2.64516
cmeB	CJSA_0339	V	RND efflux system, inner membrane transporter CmeB	82	304		2.01484e-16	3.70732
cmeA	CJSA_0340	M	RND efflux system, membrane fusion protein CmeA	102	390		3.27248e-37	3.82353
-	CJSA_0358	S	integral membrane protein	16	24		0.00123784	1.5
-	CJSA_0370		hypothetical protein	9	29		5.87937e-21	3.22222
-	CJSA_0384	R	GTP-binding protein	10	27		6.24009e-13	2.7
murD	CJSA_0404	M	UDP-N-acetylmuramoyl-L-alanyl-D-glutamate synthetase	10	22		1.09504e-08	2.2
mraY	CJSA_0405	M	phospho-N-acetylmuramoyl-pentapeptide-transferase	13	23		3.70185e-05	1.76923
sdhA	CJSA_0409	C	succinate dehydrogenase, flavoprotein subunit	35	228		3.45e-118	6.51429
sdhB	CJSA_0410	C	succinate dehydrogenase, iron-sulfur protein subunit	37	185		3.91188e-61	5
sdhB	CJSA_0411	C	succinate dehydrogenase subunit C	49	147		5.26705e-17	3
rpe	CJSA_0421	G	ribulose-phosphate 3-epimerase	33	54		0.000279081	1.63636
-	CJSA_0424		hypothetical protein	10	31		5.90829e-20	3.1
-	CJSA_0425		hypothetical protein	10	25		1.3819e-10	2.5
-	CJSA_0426		hypothetical protein	12	42		4.42978e-36	3.5
-	CJSA_0427	S	hypothetical protein	56	83		0.0105231	1.48214
rpmG	CJSA_0441	J	50S ribosomal protein L33	367	555		0.00438549	1.51226
-	CJSA_0465		hypothetical protein	21	47		1.23777e-08	2.2381
-	CJSA_0467	R	hypothetical protein	53	94		8.31153e-06	1.77358
-	CJSA_0474	R	Gfo/Idh/MocA family oxidoreductase	11	24		1.22997e-10	2.18182
-	CJSA_0475	M	DegT/DnrJ/EryC1/StrS aminotransferase family protein	41	65		0.00334052	1.58537
plsC	CJSA_0486	I	1-acyl-sn-glycerol-3-phosphate acyltransferase	16	25		0.000349851	1.5625
pbpB	CJSA_0492	M	penicillin-binding protein	15	29		1.31547e-05	1.93333
-	CJSA_0506		hypothetical protein	23	45		1.45847e-06	1.95652
-	CJSA_0507		hypothetical protein	23	44		1.7167e-07	1.91304
-	CJSA_0508	H	polyprenyl synthetase family protein	18	29		0.000240865	1.61111
hemA	CJSA_0509	H	glutamyl-tRNA reductase	20	30		0.0130364	1.5
-	CJSA_0517		hypothetical protein	172	355		9.93439e-07	2.06395
-	CJSA_0528		hypothetical protein	55	1612		0	29.3091
tatC	CJSA_0546	U	Sec-independent protein translocase TatC	17	30		9.60185e-06	1.76471
nidH	CJSA_0549	LR	dinucleoside polyphosphate hydrolase	68	119		0.000261177	1.75
ligA	CJSA_0554	L	NAD-dependent DNA ligase LigA	13	25		1.40377e-05	1.92308
nth	CJSA_0563	L	endonuclease III	11	24		1.41322e-08	2.18182
-	CJSA_0570	S	MOSC-domain containing protein	15	22		0.000358051	1.46667
dsbD	CJSA_0571	OC	thiol:disulfide interchange protein DsbD	22	34		0.00245643	1.54545
-	CJSA_0572	S	putative polyphosphate kinase	23	38		7.45272e-05	1.65217
-	CJSA_0575	V	ABC-type transmembrane transport protein	15	28		3.00753e-05	1.86667
-	CJSA_0586		hypothetical protein	16	25		0.000133957	1.5625
-	CJSA_0596	L	prophage Lp2 protein 6	72	109		0.00186649	1.51389
-	CJSA_0600	S	hypothetical protein	17	42		1.16974e-13	2.47059
msrA	CJSA_0604	O	methionine sulfoxide reductase A	45	70		0.000831313	1.55556
pnk	CJSA_0608	G	inorganic polyphosphate/ATP-NAD kinase	20	33		0.000111064	1.65
recN	CJSA_0609	L	DNA repair protein RecN	15	23		0.00087319	1.53333
-	CJSA_0616	S	OstA family protein	16	27		3.10894e-05	1.6875
-	CJSA_0636		hypothetical protein	26	56		8.45403e-08	2.15385
flgH	CJSA_0651	N	flagellar basal body L-ring protein	197	308		0.000639502	1.56345
-	CJSA_0655		hypothetical protein	16	38		1.86414e-12	2.375
-	CJSA_0658	O	hypothetical protein	44	69		0.00108017	1.56818
flgG	CJSA_0662	N	flagellar basal-body rod protein FlgG	368	535		0.039704	1.4538
-	CJSA_0672	J	putative ribosomal pseudouridine synthase	22	41		1.34972e-06	1.86364
rimM	CJSA_0676	J	16S rRNA processing protein RimM	83	158		2.15847e-05	1.90361
trmD	CJSA_0677	J	tRNA (guanine-N(1)-)-methyltransferase	22	61		8.96855e-19	2.77273
-	CJSA_0681	P	putative ArsC family protein	81	154		1.03735e-05	1.90123
-	CJSA_0699		hypothetical protein	9	28		1.82529e-20	3.11111
-	CJSA_0716	R	hypothetical protein	64	187		4.86207e-18	2.92188
-	CJSA_0717	S	hypothetical protein	40	103		3.50646e-16	2.575
-	CJSA_0726	P	NLPA family lipoprotein	52	100		9.14575e-06	1.92308
-	CJSA_0727	P	NLPA family lipoprotein	97	183		1.80956e-06	1.8866
napH	CJSA_0738	C	quinol dehydrogenase membrane component	68	104		0.00455561	1.52941
napL	CJSA_0740		hypothetical protein	11	24		1.6874e-11	2.18182
napD	CJSA_0741	P	NapD protein-like protein	7	22		2.33441e-16	3.14286
purU	CJSA_0746	F	formyltetrahydrofolate deformylase	22	32		0.00444148	1.45455
-	CJSA_0747	E	aminotransferase	11	24		7.34605e-10	2.18182
fliP	CJSA_0775	NU	flagellar biosynthetic protein FliP	14	23		1.36857e-05	1.64286
-	CJSA_0785	S	hypothetical protein	11	31		1.30117e-15	2.81818
-	CJSA_0801	R	Ser/Thr protein phosphatase family protein	22	38		0.000158816	1.72727
psd	CJSA_0802	I	phosphatidylserine decarboxylase	30	45		0.00441066	1.5
-	CJSA_0805		putative MFS (Major Facilitator Superfamily) transport protein	12	29		1.30526e-12	2.41667
folD	CJSA_0810	H	folD bifunctional protein	134	229		1.76106e-05	1.70896
-	CJSA_0818		hypothetical protein	109	296		1.39225e-13	2.7156
dsbB	CJSA_0819	O	putative disulfide oxidoreductase	54	188		3.54935e-25	3.48148
flhA	CJSA_0829	NU	flagellar biosynthesis protein FlhA	19	34		0.000182162	1.78947
-	CJSA_0830	K	RrF2 family protein, putative	35	58		8.02537e-05	1.65714
rspO	CJSA_0831	J	30S ribosomal protein S15	212	325		0.00340542	1.53302
ftsK	CJSA_0832	D	putative cell division protein	22	46		7.08272e-08	2.09091
flgL	CJSA_0833	N	flagellar hook-associated protein FlgL	155	342		7.22994e-05	2.20645
-	CJSA_0838		hypothetical protein	106	182		0.000357205	1.71698
-	CJSA_0852	S	hypothetical protein	30	57		2.05848e-05	1.9
-	CJSA_0855		hypothetical protein	16	48		2.25215e-20	3
-	CJSA_0856	R	SCO1/SenC family protein	15	35		5.04699e-11	2.33333
-	CJSA_0871		hypothetical protein	25	39		0.000171899	1.56
-	CJSA_0886	M	putative permease	16	25		0.000402929	1.5625
-	CJSA_0892	R	carbon-nitrogen family hydrolase	30	47		0.00182357	1.56667
-	CJSA_0894	E	peptidyl-arginine deiminase family protein	24	51		4.96768e-08	2.125
-	CJSA_0897		putative HAMP containing membrane protein	22	44		3.48399e-08	2
-	CJSA_0903	U	putative inner membrane protein translocase component YidC	39	57		0.00630957	1.46154
-	CJSA_0910	R	putative acyl-CoA thioester hydrolase	31	67		4.70406e-10	2.16129
-	CJSA_0920	Q	hypothetical protein	521	1045		0.000187517	2.00576
rpoD	CJSA_0944	K	RNA polymerase sigma factor RpoD	83	144		0.000363448	1.73494
-	CJSA_0964		porin domain-containing protein	16	37		7.95903e-10	2.3125
flgR	CJSA_0967	T	sigma-54 associated transcriptional activator	34	57		0.00103863	1.67647
-	CJSA_0968		hypothetical protein	82	175		2.30163e-07	2.13415
cmeD	CJSA_0974	MU	outer membrane component of efflux system (multidrug efflux system CmeDEF)	19	37		8.21156e-07	1.94737
cmeE	CJSA_0975	M	membrane fusion component of efflux system (multidrug efflux system CmeDEF)	23	43		5.54662e-07	1.86957
cmeF	CJSA_0976	V	integral membrane component of efflux system (multidrug efflux system CmeDEF)	14	26		4.29494e-05	1.85714
-	CJSA_0977	O	adenylosuccinate lyase	37	91		9.02132e-11	2.45946
-	CJSA_0986	H	putative thiamine-phosphate pyrophosphorylase	20	29		0.00159175	1.45
-	CJSA_0992	E	putative LysE family transporter protein	15	22		0.00158891	1.46667
mutS	CJSA_0995	L	recombination and DNA strand exchange inhibitor	11	23		2.75143e-06	2.09091
ssb	CJSA_1013	L	single-stranded DNA-binding protein	392	628		0.0170629	1.60204
-	CJSA_1017	S	flagellar assembly factor FliW	137	224		0.00104933	1.63504
-	CJSA_1026	R	putative ATP/GTP-binding protein	9	22		5.73182e-12	2.44444
mfd	CJSA_1027	LK	transcription-repair coupling factor	23	43		1.13052e-05	1.86957
-	CJSA_1029	M	M24/M37 family peptidase	60	117		7.6271e-06	1.95
-	CJSA_1039	E	serine/threonine transporter SstT	14	22		0.000161323	1.57143
pyrB	CJSA_1040	F	aspartate carbamoyltransferase catalytic subunit	19	37		2.5512e-07	1.94737
-	CJSA_1046	I	4-diphosphocytidyl-2-C-methyl-D-erythritol kinase	13	22		2.15847e-05	1.69231
pgll	CJSA_1070	M	glucosyl transferase	20	33		6.65067e-05	1.65
-	CJSA_1086		hypothetical protein	7	22		3.71394e-17	3.14286
rho	CJSA_1096	K	transcription termination factor Rho	59	108		4.88033e-06	1.83051
dnaX	CJSA_1097	L	DNA polymerase III subunits gamma and tau	17	37		1.42892e-08	2.17647
-	CJSA_1100		putative heavy-metal-associated domain protein	14	29		1.06928e-06	2.07143
-	CJSA_1118	V	ABC transporter ATP-binding protein	33	73		3.41581e-10	2.21212
-	CJSA_1129	T	putative PAS domain containing signal-transduction sensor protein	24	114		1.123e-76	4.75
pyrC2	CJSA_1133	F	dihydroorotase	21	35		0.000205313	1.66667
atpB	CJSA_1142	C	F0F1 ATP synthase subunit A	67	117		0.000266571	1.74627
-	CJSA_1146	H	putative 5-formyltetrahydrofolate cyclo-ligase family protein	14	23		1.87004e-05	1.64286
-	CJSA_1153	M	peptidase, M23/M37 family	37	67		9.17757e-05	1.81081
kefB	CJSA_1169	P	putative glutathione-regulated potassium-efflux system protein	24	36		0.00594259	1.5
-	CJSA_1180		hypothetical protein	470	991		6.17473e-07	2.10851
uvrC	CJSA_1184	L	excinuclease ABC subunit C	7	23		1.74457e-23	3.28571
-	CJSA_1186		hypothetical protein	26	49		1.05467e-05	1.88462
-	CJSA_1190	S	hypothetical protein	78	128		0.00133251	1.64103
-	CJSA_1191	M	hypothetical protein	26	67		6.00097e-12	2.57692
pnp	CJSA_1192	J	polynucleotide phosphorylase/polyadenylase	60	94		0.000482836	1.56667
racS	CJSA_1201	T	two-component sensor (histidine kinase)	42	62		0.00968516	1.47619
recR	CJSA_1202	L	recombination protein RecR	13	26		4.88917e-07	2
amiA	CJSA_1208	M	N-acetylmuramoyl-L-alanine amidase	22	39		0.000161323	1.77273
-	CJSA_1219	J	putative ribosomal pseudouridine synthase	34	68		6.70701e-06	2
ktrA	CJSA_1222	P	putative K+ uptake protein	15	28		6.97517e-07	1.86667
pseC	CJSA_1232	M	C4 aminotransferase specific for PseB product	102	209		2.10411e-08	2.04902
-	CJSA_1233	R	hypothetical protein	22	59		1.30526e-12	2.68182
-	CJSA_1248		hypothetical protein	36	53		0.0117499	1.47222
hisF	CJSA_1252	E	imidazole glycerol phosphate synthase subunit HisF	78	180		2.41382e-09	2.30769
maf1	CJSA_1256	S	motility accessory factor	19	44		7.47323e-09	2.31579
-	CJSA_1262	J	putative methyltransferase	24	37		0.00065087	1.54167
neuB2	CJSA_1263	M	N-acetylneuraminate synthase	95	236		4.43349e-14	2.48421
neuC2	CJSA_1264	M	putative UDP-N-acetylglucosamine 2-epimerase	13	57		1.9185e-52	4.38462
-	CJSA_1265	MJ	putative sugar-phosphate nucleotide transferase	12	31		4.61415e-17	2.58333
-	CJSA_1266	R	hypothetical protein	24	38		0.000556301	1.58333
ptmA	CJSA_1268	IQ	flagellin modification protein A	94	144		0.00139396	1.53191
pseD	CJSA_1269	S	PseD protein	8	25		5.4388e-24	3.125
maf3	CJSA_1270	S	motility accessory factor	15	31		2.654e-06	2.06667
maf4	CJSA_1271	S	motility accessory factor	18	45		1.26977e-10	2.5
pseE	CJSA_1272	S	PseE protein	43	78		4.97481e-06	1.81395
nrfA	CJSA_1292	P	putative periplasmic cytochrome C	37	124		4.97387e-25	3.35135
nrfH	CJSA_1293	C	putative periplasmic cytochrome C	16	98		2.68973e-128	6.125
ruvB	CJSA_1296	L	Holliday junction DNA helicase RuvB	19	29		0.000333424	1.52632
-	CJSA_1304	R	putative nucleotide phosphoribosyltransferase	26	46		6.31518e-06	1.76923
-	CJSA_1305	M	putative periplasmic protein (VacJ-like protein)	24	39		0.000125405	1.625
-	CJSA_1308	F	RdgB/HAM1 family non-canonical purine NTP pyrophosphatase	9	23		4.48578e-11	2.55556
-	CJSA_1315		putative lipoprotein	21	42		4.33842e-08	2
-	CJSA_1328	P	putative ferrous iron transport protein	15	40		5.69979e-14	2.66667
feoB	CJSA_1329	P	ferrous iron transport protein	16	24		0.00516682	1.5
acpS	CJSA_1340	I	4'-phosphopantetheinyl transferase	47	74		0.000383139	1.57447
kpsS	CJSA_1344	M	capsule polysaccharide export protein KpsS	11	26		1.99066e-11	2.36364
-	CJSA_1348	R	putative amidotransferase	17	45		4.86207e-18	2.64706
-	CJSA_1349	G	hypothetical protein	85	138		0.0132606	1.62353
-	CJSA_1354		capsular polysaccharide biosynthesis protein	9	26		5.56248e-18	2.88889
tagD	CJSA_1367	M	putative glycerol-3-phosphate cytidylyltransferase	29	49		1.99771e-05	1.68966
kpsM	CJSA_1372	GM	capsular polysaccharide ABC transporter permease	47	78		0.000790835	1.65957
-	CJSA_1384		hypothetical protein	22	41		1.01505e-06	1.86364
-	CJSA_1387		hypothetical protein	89	189		3.57141e-07	2.1236
flgK	CJSA_1390	N	flagellar hook-associated protein FlgK	127	239		0.00128265	1.88189
ctsR	CJSA_1398		hypothetical protein	18	40		6.66454e-09	2.22222
-	CJSA_1406		putative lipoprotein	20	34		1.87004e-05	1.7
-	CJSA_1407		hypothetical protein	52	95		7.80567e-05	1.82692
-	CJSA_1415	T	putative two-component sensor	47	116		5.75323e-11	2.46809
-	CJSA_1416	S	hypothetical protein	14	26		7.36889e-07	1.85714
-	CJSA_1418	S	hypothetical protein	77	114		0.00841495	1.48052
selD	CJSA_1426	E	putative selenide,water dikinase	27	46		0.00020614	1.7037
-	CJSA_1427	O	putative two-component response regulator (SirA-like protein)	31	50		0.000224002	1.6129
-	CJSA_1435	R	hypothetical protein	56	122		8.34226e-08	2.17857
-	CJSA_1448	R	hypothetical protein	12	22		1.01187e-06	1.83333
-	CJSA_1449	R	putative helix-turn-helix containing protein	30	55		8.79269e-05	1.83333
-	CJSA_1460		hypothetical protein	15	25		0.000171275	1.66667
-	CJSA_1486		hypothetical protein	25	44		1.1234e-05	1.76
nuoA	CJSA_1491	C	NADH dehydrogenase I subunit A	36	66		1.59612e-06	1.83333
infA	CJSA_1502	J	translation initiation factor IF-1	32	93		1.8953e-19	2.90625
rpmJ	CJSA_1503		50S ribosomal protein L36	466	978		3.7666e-07	2.09871
rpsM	CJSA_1504	J	30S ribosomal protein S13	448	754		0.00127778	1.68304
rpsK	CJSA_1505	J	30S ribosomal protein S11	461	806		0.00205285	1.74837
rpsD	CJSA_1506	J	30S ribosomal protein S4	594	1049		0.0524146	1.76599
prfA	CJSA_1524	J	peptide chain release factor 1	91	137		0.000470486	1.50549
mutY	CJSA_1532	L	A/G-specific adenine glycosylase	7	26		3.5238e-33	3.71429
-	CJSA_1533		hypothetical protein	14	25		1.04466e-06	1.78571
-	CJSA_1544		hypothetical protein	26	76		1.81623e-16	2.92308
rnhA	CJSA_1548	L	ribonuclease H	24	41		2.20528e-05	1.70833
dnaG	CJSA_1550	L	DNA primase	17	30		0.000188989	1.76471
-	CJSA_1552		hypothetical protein	18	33		4.28234e-07	1.83333
murE	CJSA_1553	M	UDP-N-acetylmuramoylalanyl-D-glutamate--2,6-diaminopimelate ligase	23	36		0.00700015	1.56522
-	CJSA_1554	S	hypothetical protein	44	77		1.47529e-05	1.75
iamB	CJSA_1558	Q	putative ABC transport system permease	10	22		5.49084e-11	2.2
-	CJSA_1562		hypothetical protein	77	199		3.43635e-12	2.58442
murL	CJSA_1564	M	glutamate racemase	11	27		6.04926e-12	2.45455
nlpC	CJSA_1565	M	putative lipoprotein nlpC	33	55		0.000105119	1.66667
nhaA2	CJSA_1566	P	Na+/H+ antiporter	32	53		0.000654678	1.65625
nhaA1	CJSA_1567	P	Na+/H+ antiporter	25	75		2.07191e-17	3
-	CJSA_1590		hypothetical protein	11	22		2.15761e-07	2
-	CJSA_1596	G	putative MSF family efflux protein	23	89		6.91029e-32	3.86957
rpsJ	CJSA_1617	J	30S ribosomal protein S10	293	426		0.00121297	1.45392
ksgA	CJSA_1620	J	dimethyladenosine transferase	44	99		2.62084e-08	2.25
-	CJSA_1624	R	GNAT family acetyltransferase	15	45		8.76929e-22	3
-	CJSA_1631	R	putative GTP cyclohydrolase I	12	31		2.79269e-10	2.58333
-	CJSA_pVir0046		putative RelE/StbE family addiction module toxin	16	25		0.00190329	1.5625
-	CJSA_pVir0013		hypothetical protein	6	25		1.39135e-28	4.16667
-	CJSA_pVir0016		hypothetical protein	12	35		6.71551e-18	2.91667
-	CJSA_pVir0020		hypothetical protein	14	28		3.10762e-06	2
-	CJSA_pVir0024		putative plasmid partioning ParA protein	33	56		6.3526e-05	1.69697
-	CJSA_pVir0025		hypothetical protein	19	87		1.78861e-63	4.57895
repE	CJSA_pVir0026		putative replication protein RepE	26	89		1.8435e-28	3.42308
-	CJSA_pVir0040		hypothetical protein	11	39		2.37287e-20	3.54545
-	CJSA_pVir0041		hypothetical protein	27	63		6.20597e-09	2.33333
-	CJSA_pVir0044		hypothetical protein	5	27		1.47157e-42	5.4
rnpB	CJSA_CjrnpB1		rnpB RNA	22	131		1.04786e-108	5.95455
-	CJSA_t0001		Ala tRNA	27	166		1.19804e-78	6.14815
-	CJSA_t0002		Ile tRNA	49	396		2.5854e-188	8.08163
-	CJSA_t0004		Ala tRNA	35	176		1.84862e-56	5.02857
-	CJSA_t0005		Ile tRNA	49	394		8.56012e-185	8.04082
-	CJSA_t0009		Thr tRNA	590	1004		0.000465334	1.70169
-	CJSA_t0011		Arg tRNA	92	209		1.96138e-10	2.27174
-	CJSA_t0012		Met tRNA	25	39		0.00429844	1.56
-	CJSA_t0014		Ala tRNA	34	155		2.48409e-43	4.55882
-	CJSA_t0015		Ile tRNA	51	392		6.04159e-170	7.68627
-	CJSA_t0019		Asp tRNA	25	54		2.54593e-06	2.16
-	CJSA_t0020		Val tRNA	46	81		9.4103e-05	1.76087
-	CJSA_t0023		Val tRNA	64	140		7.24798e-08	2.1875
-	CJSA_t0024		Lys tRNA	29	51		0.000570747	1.75862
-	CJSA_t0033		Leu tRNA	418	735		0.000180658	1.75837
-	CJSA_t0034		Cys tRNA	255	443		1.20953e-05	1.73725
-	CJSA_t0035		Ser tRNA	81	189		4.48281e-11	2.33333
-	CJSA_t0037		Arg tRNA	318	617		1.74839e-06	1.94025
-	CJSA_t0038		Arg tRNA	583	1251		1.75067e-07	2.1458
-	CJSA_t0040		Pro tRNA	81	124		0.00131578	1.53086
-	CJSA_t0043		Ala tRNA	19	36		8.67298e-06	1.89474
-	CJSA_t0044		Val tRNA	53	122		2.04245e-09	2.30189
-	predicted RNA		100nt length; 726401 to 726300 negative strand	179	267		0.00122533	1.49162
-	predicted RNA		18nt length; 1463578 to 1463560 negative strand	22	34		0.0139677	1.54545
-	predicted RNA		283 nt length; 1046498 to1046215 negative strand	80	129		0.000347665	1.6125
-	predicted RNA		antisense: CJSA_0390; 81nt length, 388537 to 388618 positive strand	41	68		0.000389788	1.65854
-	predicted RNA		31 nt length; 138682 to 1386313 positive strand	119	202		0.000158816	1.69748
-	predicted RNA		11nt length; 914526 to 914537 positive strand	61	106		0.000654678	1.7377
-	predicted RNA		10nt length; 1163099 to 1163109 positive strand	55	101		0.000299527	1.83636
-	predicted RNA		antisense: CJSA_0223; 161nt length, 231589 to 231750 positive strand	58	113		6.48627e-08	1.94828
-	predicted RNA		129nt length; 199501 to 199372 negative strand	95	186		1.00018e-07	1.95789
-	predicted RNA		55nt length; 417148 to 417203 positive strand	20	41		6.01104e-07	2.05
-	predicted RNA		antisense: CJSA_0417; 44nt 419785 to 419741 negative strand	99	208		3.33162e-07	2.10101
-	predicted RNA		antisense: CJSA_0826; 174nt length, 818541 to 818715 positive strand	13	28		9.16386e-07	2.15385
-	predicted RNA		antisense: CJSA_0921; 93nt length; 915128 to 915221 positive strand	45	97		9.96806e-08	2.15556
-	predicted RNA		antisense: CJSA_0363; 359nt length, 362675 to 362316 negative strand	72	156		3.48399e-08	2.16667
-	predicted RNA		22nt length; 1053999 to 1053977 negative strand	46	101		2.16442e-08	2.19565
-	predicted RNA		23nt length; 197874 to 197897 positive strand	13	30		7.24937e-06	2.30769
-	predicted RNA		16nt length; 71942 to 71926 negative strand	77	180		7.19253e-10	2.33766
-	predicted RNA		70nt length; 1175070 to 1175140 positive strand	106	266		9.01091e-14	2.50943
-	predicted RNA		antisense: ispG; 155nt length, 644706 to 644551 negative strand	32	86		5.9683e-13	2.6875
-	predicted RNA		34nt length; 1522668 to 1522702 positive strand	44	131		2.56811e-16	2.97727
-	predicted RNA		129nt length; 1193304 to 1193433 positive strand	23	71		1.4597e-17	3.08696
-	predicted RNA		antisense: CJSA_0390; 14nt length, 388983 to 388997 positive strand	8	25		2.78007e-12	3.125
-	predicted RNA		9nt length; 198494 to 198503 positive strand	18	58		4.5533e-17	3.22222
-	predicted RNA		23nt length; 198048 to 198071 positive strand	10	34		3.57095e-17	3.4
-	predicted RNA		69nt length; 210449 to 210518 positive strand	17	61		2.52742e-24	3.58824
-	predicted RNA		antisense: pbpA; 61nt length, 479304 to 479243 negative strand	14	51		3.58318e-25	3.64286
-	predicted RNA		109nt length; 815016 to 815125 positive strand	52	208		2.7634e-37	4
-	predicted RNA		antisense: glnA; 123nt length, 660916 to 661039 positive strand	8	32		4.53827e-35	4
-	predicted RNA		34nt length; 1555303 to 1555269 negative strand	11	44		5.51997e-29	4
-	predicted RNA		35nt length; 1259305 to 1259340 positive strand	37	149		6.58056e-36	4.02703
-	predicted RNA		10nt length; 1175229 to 1175239 positive strand	7	29		1.16921e-21	4.14286
-	predicted RNA		37nt length; 198556 to 198593 positive strand	16	67		4.91896e-31	4.1875
-	predicted RNA		52nt length; 959493 to 959441 negative strand	9	49		6.39426e-58	5.44444
-	predicted RNA		antisense: pseE; 274nt length 1272527 to 1272253 negative strand	8	45		6.72299e-66	5.625
-	predicted RNA		94nt length; 1572367 to 1572461 positive strand	13	78		4.11365e-81	6
-	predicted RNA		17nt length; 1465 to 1482 positive strand	6	49		3.88814e-105	8.16667
-	predicted RNA		20nt length; 409962 6o 409982 positive strand	12	173		0	14.4167
-	predicted RNA		19nt length; 59713 to 59732 positive strand	8	122		0	15.25
-	predicted RNA		24nt length; 828765 to 828741 negative strand	2	56		0	28
-	predicted RNA		13nt length; 645467 to 645454 negative strand	1	37		7.78837e-301	37
-	predicted RNA		25 nt length; 31479 to 31504 positive strand pVir	47	138		2.14844e-16	2.93617

## Sheet: S4-Bile 24hr genes diff exp
Supplementary Table S5. Genes with demonstrated significant changes in expression, 24 hour bile exposure
				Expression (RPKM)			Significance
Name	Synonym	COG Code	Product	Plate 16hr	Bile in vitro 24 hr		Q Value	Fold change
DECREASED EXPRESSION AT 24 HOURS EXPOSURE TO BILE
gltD	CJSA_0009	ER	glutamate synthase subunit beta	114	57		0.0252733	-2
-	CJSA_0016	R	ExsB protein	55	28		0.0297026	-1.96429
-	CJSA_0025	R	sodium/dicarboxylate symporter	151	20		8.86146e-78	-7.55
trxB	CJSA_0137	O	thioredoxin-disulfide reductase	564	229		5.71237e-05	-2.46288
-	CJSA_0165	P	iron ABC transporter periplasmic iron-binding protein	1000	409		0.037954	-2.44499
-	CJSA_0192		hypothetical protein	46	18		0.00877524	-2.55556
-	CJSA_0216	C	NifU family protein	790	335		0.00882718	-2.35821
iscS	CJSA_0217	E	cysteine desulfurase	517	233		0.00572618	-2.21888
peb3	CJSA_0265	R	major antigenic peptide PEB3	560	287		0.00528635	-1.95122
panD	CJSA_0270	H	aspartate alpha-decarboxylase	116	43		1.50966e-06	-2.69767
panC	CJSA_0271	H	pantoate--beta-alanine ligase	156	54		9.37863e-06	-2.88889
panB	CJSA_0272	H	3-methyl-2-oxobutanoate	197	82		0.0010473	-2.40244
modA	CJSA_0277	P	molybdate transport system substrate-binding protein	207	81		0.000237052	-2.55556
-	CJSA_0352	R	putative sulfite oxidase subunit YedY	342	147		0.000393365	-2.32653
uxaA	CJSA_0452	G	putative altronate hydrolase N-terminus	79	41		0.0522485	-1.92683
trpC	CJSA_0469	E	indole-3-glycerol phosphate synthase	56	29		0.037375	-1.93103
-	CJSA_0520	S	hypothetical protein	95	34		1.15976e-05	-2.79412
-	CJSA_0521		hypothetical protein	140	42		8.483e-09	-3.33333
dcuB	CJSA_0635	R	anaerobic C4-dicarboxylate transporter	294	166		0.0307454	-1.77108
glnA	CJSA_0663	E	glutamine synthetase, type I	463	158		1.01402e-06	-2.93038
-	CJSA_0687	O	M48 family peptidase	28	15		0.0389484	-1.86667
tonB3	CJSA_0710	M	TonB transport protein	23	10		0.0235276	-2.3
cfrA	CJSA_0712	P	ferric enterobactin uptake receptor	22	5		2.06017e-19	-4.4
cysM	CJSA_0857	E	cysteine synthase	250	95		2.77705e-05	-2.63158
-	CJSA_0861	S	hypothetical protein	147	64		0.000473711	-2.29688
cstA	CJSA_0862	T	carbon starvation protein A	293	133		0.00758183	-2.20301
cjaA	CJSA_0925	ET	putative amino-acid transporter periplasmic solute-binding protein	1299	347		5.51547e-08	-3.74352
hipO	CJSA_0928	R	hippurate hydrolase	90	44		0.0487114	-2.04545
-	CJSA_0930	P	putative MFS (Major Facilitator Superfamily) transport protein	75	33		0.00412838	-2.27273
-	CJSA_0955		hypothetical protein	38	16		0.0105985	-2.375
livJ	CJSA_0962	E	high affinity branched-chain amino acid ABC transporter periplasmic amino acid-binding protein	185	97		0.0292853	-1.90722
-	CJSA_1102	S	hypothetical protein	279	115		0.000569468	-2.42609
cetB	CJSA_1127	T	bipartate energy taxis response protein cetB	314	126		0.000450754	-2.49206
cetA	CJSA_1128	NT	bipartate energy taxis response protein cetA	433	225		0.0342422	-1.92444
-	CJSA_1137	R	2OG-Fe(II) oxygenase	196	66		6.64957e-07	-2.9697
-	CJSA_1138	P	putative NLPA family lipoprotein	156	28		1.86973e-37	-5.57143
metE	CJSA_1139	E	5-methyltetrahydropteroyltriglutamate/homocysteine S-methyltransferase	140	28		1.39465e-25	-5
metF	CJSA_1140	E	5,10-methylenetetrahydrofolate reductase	38	6		3.60803e-37	-6.33333
ceuE	CJSA_1290	P	enterochelin ABC transporter, periplasmic enterochelin-binding protein	50	19		3.76324e-06	-2.63158
-	CJSA_1318	S	hypothetical protein	41	8		6.67737e-19	-5.125
-	CJSA_1322	J	putative endoribonuclease L-PSP	477	159		3.35082e-07	-3
putP	CJSA_1424	ER	putative sodium/proline permease	451	154		8.97949e-07	-2.92857
-	CJSA_1437	Q	putative periplasmic oxidoreductase	255	146		0.0382978	-1.74658
moaE	CJSA_1439	H	putative molybdopterin converting factor,subunit 2	196	88		0.0101602	-2.22727
chuA	CJSA_1526	P	hemin uptake system outer membrane receptor	32	10		1.10726e-08	-3.2
exbB2	CJSA_1540	U	exbB/tolQ family transport protein	59	12		5.4393e-21	-4.91667
-	CJSA_1569	P	putative FTR1 family iron permease	209	81		2.65239e-06	-2.58025
p19	CJSA_1570	P	periplasmic protein p19	1423	350		2.32491e-16	-4.06571
-	CJSA_1571	S	hypothetical protein	34	9		4.20447e-16	-3.77778
-	CJSA_1572	M	ABC transporter permease	54	10		8.03323e-40	-5.4
-	CJSA_1573	M	ABC transporter permease	35	5		3.71498e-45	-7
-	CJSA_1574	V	ABC transporter ATP-binding protein	98	21		7.86218e-26	-4.66667
-	CJSA_1575	OC	putative periplasmic thiredoxin	65	13		1.46243e-23	-5
-	CJSA_1576		putative lipoprotein thiredoxin	31	8		2.28644e-09	-3.875
virB8	CJSA_pVir0001		virulence protein	21	9		0.00787576	-2.33333
virB9	CJSA_pVir0002		VirB9	37	12		7.34662e-09	-3.08333
virB10	CJSA_pVir0003		VirB10	23	9		4.73166e-05	-2.55556
-	CJSA_pVir0008		hypothetical protein	644	241		9.57549e-05	-2.6722
-	CJSA_pVir0009		hypothetical protein	1372	508		0.0111451	-2.70079
-	CJSA_pVir0050		hypothetical protein	128	24		1.67525e-28	-5.33333
-	CJSA_pVir0051		hypothetical protein	40	8		6.908e-21	-5
-	CJSA_CjSRP1		SRP RNA	18640	5641		0.00167259	-3.30438
-	CJSA_t0016		Leu tRNA	86	37		0.0178048	-2.32432
-	CJSA_t0030		Ser tRNA	436	63		2.97414e-53	-6.92063
-	predicted RNA		10nt length; 1134343 to 1134353 positive strand	122	24		7.97575e-38	-5.08333
-	predicted RNA		176nt length; 1331258 to 1331434 positive strand	198	43		3.06749e-20	-4.60465
-	predicted RNA		antisense: CJSA_1568; 87nt length, 1577262 to 1577349 positive strand	216	53		5.67471e-12	-4.07547
-	predicted RNA		antisense: glnQ; 86nt length, 845047 to 844961 negative strand	179	49		8.64426e-09	-3.65306
-	predicted RNA		antisense: CJSA_0911; 27nt length, 907301 to 907274 negative strand	116	33		5.25096e-12	-3.51515
-	predicted RNA		9nt length; 1133562 to 1133571 positive strand	120	37		2.87258e-13	-3.24324
-	predicted RNA		10nt length; 443535 to 443545 positive strand	147	48		5.67471e-12	-3.0625
-	predicted RNA		106nt length; 1331076 to 1331182 positive strand	233	78		6.54166e-07	-2.98718
-	predicted RNA		9nt length; 307645 to 307654 positive strand	281	98		1.2353e-07	-2.86735
-	predicted RNA		antisense: groES; 20nt length, 1153731 to 1153711 negative strand	53	22		2.03135e-06	-2.40909
-	predicted RNA		antisense: prfA; 96nt length, 1537068 to 1536972 negative strand	86	38		0.0340705	-2.26316
-	predicted RNA		antisense: CJSA_0215; 50nt length, 226428 to 226378 negative strand	136	61		0.0339589	-2.22951
-	predicted RNA		antisense: CJSA_0136; 16nt length, 150574 to 150558 negative strand	65	30		0.000167787	-2.16667
-	predicted RNA		21nt length; 7622 to 7643 positive strand pVir	577	165		2.04587e-08	-3.49697
INCREASED EXPRESSION AT 24 HOURS EXPOSURE TO BILE
dnaA	CJSA_0001	L	chromosomal replication initiator protein DnaA	21	44		2.64936e-07	2.09524
dnaN	CJSA_0002	L	DNA polymerase III subunit beta	32	94		1.86425e-15	2.9375
-	CJSA_0014	S	hypothetical protein	121	229		1.02355e-05	1.89256
-	CJSA_0035	G	MFS family drug resistance transporter	15	55		5.65191e-38	3.66667
-	CJSA_0040		hypothetical protein	15	227		0	15.1333
-	CJSA_0041		hypothetical protein	62	134		3.05688e-09	2.16129
flgE	CJSA_0043	N	flagellar hook protein	160	243		0.0157084	1.51875
-	CJSA_0045	P	putative iron-binding protein	39	165		2.43968e-39	4.23077
-	CJSA_0049		hypothetical protein	53	84		0.002154	1.58491
-	CJSA_0056		hypothetical protein	34	108		2.70203e-28	3.17647
flhF	CJSA_0058	N	flagellar biosynthesis regulator FlhF	31	46		0.0100324	1.48387
folK	CJSA_0059	H	2-amino-4-hydroxy-6-hydroxymethyldihydropteridine pyrophosphokinase	21	65		3.03397e-26	3.09524
-	CJSA_0061	FR	chlorohydrolase	13	33		4.1257e-14	2.53846
-	CJSA_0065	P	hemerythrin family non-heme iron protein	7	23		1.71776e-18	3.28571
birA	CJSA_0090	H	biotin--protein ligase	20	39		7.90475e-08	1.95
-	CJSA_0091	D	ParA family chromosome partitioning ATPase	73	145		2.6928e-06	1.9863
-	CJSA_0092	K	ParB family chromosome partitioning protein	29	51		6.15384e-05	1.75862
atpF'	CJSA_0093	C	F0F1 ATP synthase subunit B	67	168		2.40655e-11	2.50746
atpF	CJSA_0094	C	F0F1 ATP synthase subunit B	37	78		1.68016e-09	2.10811
-	CJSA_0102		TonB domain-containing protein	17	32		6.64957e-07	1.88235
-	CJSA_0105	S	hypothetical protein	147	311		8.37925e-08	2.11565
-	CJSA_0110	Q	putative pyrazinamidase/nicotinamidase	18	45		3.47599e-15	2.5
-	CJSA_0113		hypothetical protein	115	192		0.00019866	1.66957
-	CJSA_0115		hypothetical protein	13	24		3.82864e-06	1.84615
-	CJSA_0124	O	putative glycoprotease family protein	10	28		5.78039e-15	2.8
-	CJSA_0126	K	hypothetical protein	19	55		6.58242e-16	2.89474
-	CJSA_0132	P	cation ABC transporter permease	15	24		6.1643e-05	1.6
-	CJSA_0142		hypothetical protein	5	23		1.12566e-50	4.6
-	CJSA_0143		hypothetical protein	56	92		0.000896778	1.64286
-	CJSA_0144	J	RNA methyltransferase	134	214		0.000251058	1.59701
-	CJSA_0166		putative lipoprotein	14	49		7.46693e-19	3.5
-	CJSA_0172	I	putative transporter	21	46		3.53364e-08	2.19048
argC	CJSA_0201	E	N-acetyl-gamma-glutamyl-phosphate reductase	55	92		0.000395014	1.67273
pcm	CJSA_0205	O	protein-L-isoaspartate O-methyltransferase	41	79		3.66504e-06	1.92683
-	CJSA_0207	H	nicotinate phosphoribosyltransferase	20	33		0.000792927	1.65
-	CJSA_0209	S	hypothetical protein	17	41		1.19933e-11	2.41176
tal	CJSA_0257	G	transaldolase	24	40		0.000237617	1.66667
-	CJSA_0262	S	hypothetical protein	17	26		0.000625505	1.52941
-	CJSA_0284	P	SMR family multidrug efflux pump	13	30		2.88303e-09	2.30769
rplY	CJSA_0285	J	50S ribosomal protein L25/general stress protein Ctc	369	545		0.0442437	1.47696
pth	CJSA_0286	J	peptidyl-tRNA hydrolase	85	125		0.0079337	1.47059
perR	CJSA_0296	P	FUR family transcriptional regulator	47	105		3.97205e-11	2.23404
ubiE	CJSA_0298	H	ubiquinone/menaquinone biosynthesis methyltransferase	15	28		6.73148e-07	1.86667
fabH	CJSA_0302	I	3-oxoacyl-ACP synthase	39	71		4.34203e-05	1.82051
plsX	CJSA_0303	I	putative glycerol-3-phosphate acyltransferase PlsX	116	169		0.00477635	1.4569
-	CJSA_0305		hypothetical protein	124	344		2.84815e-14	2.77419
trpE	CJSA_0319	EH	anthranilate synthase component I	41	66		0.00159759	1.60976
trpF	CJSA_0321	E	N-(5phosphoribosyl)anthranilate isomerase	23	39		1.97746e-05	1.69565
-	CJSA_0326		putative transmembrane protein	11	23		4.43482e-08	2.09091
-	CJSA_0337		hypothetical protein	2	23		6.16967e-150	11.5
cmeC	CJSA_0338	MU	RND efflux system, outer membrane lipoprotein CmeC	62	110		1.00086e-05	1.77419
cmeB	CJSA_0339	V	RND efflux system, inner membrane transporter CmeB	82	159		0.000509015	1.93902
cmeA	CJSA_0340	M	RND efflux system, membrane fusion protein CmeA	102	215		1.07593e-08	2.10784
cmeR	CJSA_0341	K	TetR family transcriptional regulator	35	60		3.14665e-05	1.71429
-	CJSA_0370		hypothetical protein	9	45		4.639e-63	5
-	CJSA_0389		hypothetical protein	178	375		1.16759e-07	2.10674
-	CJSA_0390		hypothetical protein	30	54		2.13839e-06	1.8
-	CJSA_0394		putative H-T-H containing protein	20	53		1.88076e-12	2.65
mraY	CJSA_0405	M	phospho-N-acetylmuramoyl-pentapeptide-transferase	13	25		3.33805e-07	1.92308
sdhA	CJSA_0409	C	succinate dehydrogenase, flavoprotein subunit	35	51		0.00746608	1.45714
sdhB	CJSA_0410	C	succinate dehydrogenase, iron-sulfur protein subunit	37	56		0.00444391	1.51351
rpmB	CJSA_0420	J	50S ribosomal protein L28	129	232		2.77705e-05	1.79845
rpe	CJSA_0421	G	ribulose-phosphate 3-epimerase	33	61		2.84391e-06	1.84848
-	CJSA_0426		hypothetical protein	12	45		2.46418e-42	3.75
-	CJSA_0427	S	hypothetical protein	56	92		0.00088493	1.64286
-	CJSA_0429		hypothetical protein	94	154		0.000423928	1.6383
-	CJSA_0465		hypothetical protein	21	35		0.000584292	1.66667
-	CJSA_0475	M	DegT/DnrJ/EryC1/StrS aminotransferase family protein	41	62		0.00657846	1.5122
pbpB	CJSA_0492	M	penicillin-binding protein	15	28		5.16137e-05	1.86667
-	CJSA_0506		hypothetical protein	23	67		1.84657e-17	2.91304
-	CJSA_0507		hypothetical protein	23	49		5.39901e-10	2.13043
-	CJSA_0508	H	polyprenyl synthetase family protein	18	29		0.000170611	1.61111
-	CJSA_0528		hypothetical protein	55	871		0	15.8364
tatC	CJSA_0546	U	Sec-independent protein translocase TatC	17	38		1.08124e-10	2.23529
tatB	CJSA_0547	U	sec-independent translocase	36	80		5.20909e-11	2.22222
nidH	CJSA_0549	LR	dinucleoside polyphosphate hydrolase	68	128		2.45207e-05	1.88235
nth	CJSA_0563	L	endonuclease III	11	46		2.93761e-43	4.18182
algl	CJSA_0579	M	alginate O-acetyltransferase AlgI	13	25		5.03204e-07	1.92308
-	CJSA_0585		hypothetical protein	29	43		0.000758927	1.48276
-	CJSA_0596	L	prophage Lp2 protein 6	72	154		2.89306e-08	2.13889
-	CJSA_0600	S	hypothetical protein	17	41		2.19775e-12	2.41176
pnk	CJSA_0608	G	inorganic polyphosphate/ATP-NAD kinase	20	34		6.67609e-05	1.7
-	CJSA_0616	S	OstA family protein	16	30		1.47434e-06	1.875
-	CJSA_0636		hypothetical protein	26	60		6.61109e-09	2.30769
flgH	CJSA_0651	N	flagellar basal body L-ring protein	197	343		9.29183e-05	1.74112
-	CJSA_0655		hypothetical protein	16	63		1.22911e-44	3.9375
mraW	CJSA_0657	M	S-adenosyl-methyltransferase MraW	9	31		1.65773e-32	3.44444
-	CJSA_0658	O	hypothetical protein	44	66		0.00328683	1.5
-	CJSA_0664		hypothetical protein	100	148		0.00419571	1.48
glyQ	CJSA_0668	J	glycyl-tRNA synthetase subunit alpha	38	58		0.00493652	1.52632
-	CJSA_0669	S	hypothetical protein	13	27		3.87091e-10	2.07692
-	CJSA_0670	R	hypothetical protein	72	116		0.00150053	1.61111
-	CJSA_0672	J	putative ribosomal pseudouridine synthase	22	36		6.31279e-05	1.63636
rimM	CJSA_0676	J	16S rRNA processing protein RimM	83	130		0.00309199	1.56627
trmD	CJSA_0677	J	tRNA (guanine-N(1)-)-methyltransferase	22	47		1.05307e-09	2.13636
-	CJSA_0681	P	putative ArsC family protein	81	146		3.66339e-05	1.80247
-	CJSA_0688		hypothetical protein	96	168		5.58893e-06	1.75
corA	CJSA_0690	P	magnesium and cobalt transport protein	88	131		0.00208697	1.48864
hcrA	CJSA_0713	K	heat-inducible transcription repressor	265	418		0.0155672	1.57736
-	CJSA_0716	R	hypothetical protein	64	107		0.000270639	1.67188
flgA	CJSA_0725	NO	flagellar basal body P-ring biosynthesis protein FlgA	10	24		5.71392e-11	2.4
-	CJSA_0732		hypothetical protein	43	91		3.16978e-07	2.11628
napH	CJSA_0738	C	quinol dehydrogenase membrane component	68	150		6.16881e-08	2.20588
napB	CJSA_0739	C	periplasmic nitrate reductase small subunit (cytochrome C-type protein)	192	298		0.000693167	1.55208
napL	CJSA_0740		hypothetical protein	11	27		6.02364e-16	2.45455
napD	CJSA_0741	P	NapD protein-like protein	7	27		3.20172e-24	3.85714
-	CJSA_0747	E	aminotransferase	11	23		4.78371e-09	2.09091
-	CJSA_0761	R	M16 family peptidase	28	42		0.00626374	1.5
-	CJSA_0765	R	metallo-beta-lactamase family protein	21	37		3.44013e-06	1.7619
fliP	CJSA_0775	NU	flagellar biosynthetic protein FliP	14	27		5.51091e-08	1.92857
-	CJSA_0785	S	hypothetical protein	11	68		5.42691e-100	6.18182
-	CJSA_0787	C	Na+/H+ antiporter family protein	64	94		0.0036995	1.46875
-	CJSA_0789	R	ankyrin repeat-containing protein	40	110		1.47183e-13	2.75
mobB	CJSA_0796	H	molybdopterin-guanine dinucleotide biosynthesis protein MobB	5	23		8.68091e-33	4.6
-	CJSA_0801	R	Ser/Thr protein phosphatase family protein	22	40		2.11239e-05	1.81818
psd	CJSA_0802	I	phosphatidylserine decarboxylase	30	49		0.000319905	1.63333
-	CJSA_0805		putative MFS (Major Facilitator Superfamily) transport protein	12	34		1.43995e-19	2.83333
-	CJSA_0809		hypothetical protein	45	82		1.68359e-06	1.82222
fspA2	CJSA_0814		FspA2	114	186		0.00117404	1.63158
-	CJSA_0818		hypothetical protein	109	236		8.7673e-08	2.16514
dsbB	CJSA_0819	O	putative disulfide oxidoreductase	54	117		1.07052e-07	2.16667
flhA	CJSA_0829	NU	flagellar biosynthesis protein FlhA	19	30		0.00418605	1.57895
-	CJSA_0830	K	RrF2 family protein, putative	35	72		7.81232e-09	2.05714
rspO	CJSA_0831	J	30S ribosomal protein S15	212	529		4.15233e-11	2.49528
flgL	CJSA_0833	N	flagellar hook-associated protein FlgL	155	291		0.00130572	1.87742
-	CJSA_0846		small hydrophobic protein	10	32		8.85261e-15	3.2
glnQ	CJSA_0848	E	amino acid ABC transporter ATP-binding protein	14	23		2.49741e-05	1.64286
-	CJSA_0852	S	hypothetical protein	30	60		2.5142e-06	2
-	CJSA_0855		hypothetical protein	16	42		6.53342e-15	2.625
-	CJSA_0856	R	SCO1/SenC family protein	15	24		0.000309551	1.6
rpiB	CJSA_0870	G	ribose 5-phosphate isomerase B	54	88		0.000237052	1.62963
-	CJSA_0871		hypothetical protein	25	49		5.43879e-08	1.96
-	CJSA_0903	U	putative inner membrane protein translocase component YidC	39	57		0.0076264	1.46154
-	CJSA_0920	Q	hypothetical protein	521	787		0.012965	1.51056
ribA	CJSA_0939	H	GTP cyclohydrolase II	20	30		0.000407409	1.5
rpoD	CJSA_0944	K	RNA polymerase sigma factor RpoD	83	157		4.00685e-05	1.89157
-	CJSA_0952	S	TrkA domain-containing protein	17	34		2.07482e-06	2
-	CJSA_0964		porin domain-containing protein	16	43		2.28477e-13	2.6875
cmeD	CJSA_0974	MU	outer membrane component of efflux system (multidrug efflux system CmeDEF)	19	50		4.90364e-15	2.63158
cmeE	CJSA_0975	M	membrane fusion component of efflux system (multidrug efflux system CmeDEF)	23	35		0.000313607	1.52174
-	CJSA_0977	O	adenylosuccinate lyase	37	125		1.36828e-23	3.37838
-	CJSA_0983	P	putative MFS (Major Facilitator Superfamily) transport protein	5	23		2.80778e-41	4.6
-	CJSA_0984		putative periplasmic ATP/GTP-binding protein	20	36		7.98314e-06	1.8
murC	CJSA_0997	M	UDP-N-acetylmuramate--L-alanine ligase	34	61		0.000144384	1.79412
-	CJSA_1017	S	flagellar assembly factor FliW	137	264		1.04499e-05	1.92701
-	CJSA_1029	M	M24/M37 family peptidase	60	102		0.000473195	1.7
folC	CJSA_1030	H	olylpolyglutamate synthase/dihydrofolate synthase	7	27		7.03505e-35	3.85714
-	CJSA_1039	E	serine/threonine transporter SstT	14	23		2.98424e-05	1.64286
pyrB	CJSA_1040	F	aspartate carbamoyltransferase catalytic subunit	19	33		1.34659e-05	1.73684
-	CJSA_1046	I	4-diphosphocytidyl-2-C-methyl-D-erythritol kinase	13	26		5.25529e-08	2
-	CJSA_1053	U	MarC family integral membrane protein	23	37		0.000107579	1.6087
gmhB	CJSA_1092	E	D,D-heptose 1,7-bisphosphate phosphatase	10	23		1.24304e-09	2.3
rho	CJSA_1096	K	transcription termination factor Rho	59	103		5.48646e-05	1.74576
dnaX	CJSA_1097	L	DNA polymerase III subunits gamma and tau	17	36		6.74275e-08	2.11765
-	CJSA_1100		putative heavy-metal-associated domain protein	14	32		8.05727e-09	2.28571
-	CJSA_1129	T	putative PAS domain containing signal-transduction sensor protein	24	50		1.02979e-09	2.08333
pyrC2	CJSA_1133	F	dihydroorotase	21	40		1.51227e-06	1.90476
atpB	CJSA_1142	C	F0F1 ATP synthase subunit A	67	108		0.00142131	1.61194
-	CJSA_1146	H	putative 5-formyltetrahydrofolate cyclo-ligase family protein	14	32		1.48443e-12	2.28571
-	CJSA_1180		hypothetical protein	470	999		3.40132e-07	2.12553
-	CJSA_1186		hypothetical protein	26	57		5.54124e-08	2.19231
-	CJSA_1191	M	hypothetical protein	26	39		0.00839963	1.5
-	CJSA_1194	R	putative isomerase	13	29		1.28697e-07	2.23077
-	CJSA_1196	G	putative efflux pump	20	34		0.00012211	1.7
-	CJSA_1219	J	putative ribosomal pseudouridine synthase	34	53		0.00442517	1.55882
pseC	CJSA_1232	M	C4 aminotransferase specific for PseB product	102	149		0.00402781	1.46078
-	CJSA_1233	R	hypothetical protein	22	37		0.000494436	1.68182
acpP2	CJSA_1237	IQ	putative acyl carrier protein	48	86		2.39015e-06	1.79167
-	CJSA_1244		hypothetical protein	22	33		0.00528635	1.5
-	CJSA_1246		putative acyl carrier protein	40	59		0.00104945	1.475
-	CJSA_1248		hypothetical protein	36	56		0.00238542	1.55556
maf1	CJSA_1256	S	motility accessory factor	19	41		1.54408e-07	2.15789
-	CJSA_1262	J	putative methyltransferase	24	46		1.29068e-07	1.91667
neuB2	CJSA_1263	M	N-acetylneuraminate synthase	95	176		2.25981e-06	1.85263
neuC2	CJSA_1264	M	putative UDP-N-acetylglucosamine 2-epimerase	13	32		2.99534e-13	2.46154
-	CJSA_1265	MJ	putative sugar-phosphate nucleotide transferase	12	23		1.7779e-08	1.91667
-	CJSA_1266	R	hypothetical protein	24	56		3.6535e-11	2.33333
maf4	CJSA_1271	S	motility accessory factor	18	41		1.69045e-08	2.27778
-	CJSA_1283		putative coiled-coil protein	104	154		0.00782394	1.48077
nrfA	CJSA_1292	P	putative periplasmic cytochrome C	37	122		6.87972e-24	3.2973
nrfH	CJSA_1293	C	putative periplasmic cytochrome C	16	101		1.6592e-138	6.3125
-	CJSA_1295		hypothetical protein	116	200		0.000248609	1.72414
ruvB	CJSA_1296	L	Holliday junction DNA helicase RuvB	19	30		0.000106873	1.57895
-	CJSA_1302	HR	hypothetical protein	69	110		0.000834423	1.5942
-	CJSA_1303	R	putative permease	56	93		0.00019866	1.66071
-	CJSA_1304	R	putative nucleotide phosphoribosyltransferase	26	55		8.32478e-10	2.11538
-	CJSA_1308	F	RdgB/HAM1 family non-canonical purine NTP pyrophosphatase	9	25		1.77497e-12	2.77778
-	CJSA_1315		putative lipoprotein	21	35		6.87346e-05	1.66667
-	CJSA_1321	S	helix-turn-helix containing protein	17	40		3.27804e-13	2.35294
-	CJSA_1328	P	putative ferrous iron transport protein	15	30		6.69988e-07	2
-	CJSA_1343		hypothetical protein	9	34		9.35761e-35	3.77778
kpsS	CJSA_1344	M	capsule polysaccharide export protein KpsS	11	24		1.312e-09	2.18182
-	CJSA_1348	R	putative amidotransferase	17	33		2.95374e-08	1.94118
-	CJSA_1352	M	putative sugar transferase	8	26		5.56475e-26	3.25
-	CJSA_1353	M	capsular polysaccharide biosynthesis protein	44	64		0.0134564	1.45455
-	CJSA_1354		capsular polysaccharide biosynthesis protein	9	39		5.4075e-47	4.33333
-	CJSA_1355		capsule biosynthesis phosphatase	85	153		7.02804e-05	1.8
-	CJSA_1364		putative sugar transferase	14	33		6.35388e-10	2.35714
tagF	CJSA_1365	M	putative CDP glycerol glycerophosphotransferase	16	32		1.3378e-05	2
tagD	CJSA_1367	M	putative glycerol-3-phosphate cytidylyltransferase	29	48		2.99099e-05	1.65517
kpsM	CJSA_1372	GM	capsular polysaccharide ABC transporter permease	47	81		0.000181352	1.7234
-	CJSA_1373	S	hypothetical protein	20	39		5.204e-08	1.95
prfB	CJSA_1379	J	peptide chain release factor 2	30	44		0.0112379	1.46667
-	CJSA_1383		hypothetical protein	27	51		3.03762e-05	1.88889
-	CJSA_1384		hypothetical protein	22	39		9.21744e-06	1.77273
-	CJSA_1387		hypothetical protein	89	156		0.000182949	1.75281
-	CJSA_1392	R	hypothetical protein	12	25		1.73231e-10	2.08333
ctsR	CJSA_1398		hypothetical protein	18	54		5.69976e-18	3
-	CJSA_1406		putative lipoprotein	20	41		1.07644e-08	2.05
-	CJSA_1407		hypothetical protein	52	85		0.00125908	1.63462
ccoQ	CJSA_1411	O	cb-type cytochrome C oxidase subunit IV	166	281		0.000450754	1.69277
-	CJSA_1415	T	putative two-component sensor	47	80		0.000395014	1.70213
-	CJSA_1418	S	hypothetical protein	77	117		0.00442517	1.51948
-	CJSA_1427	O	putative two-component response regulator (SirA-like protein)	31	75		3.37198e-13	2.41935
fdhC	CJSA_1431	C	formate dehydrogenase, cytochrome b subunit	147	284		2.6928e-06	1.93197
fdhB	CJSA_1432	C	putative formate dehydrogenase iron-sulfur subunit	178	294		0.00017738	1.65169
-	CJSA_1434		Tat pathway signal sequence domain-containing protein	185	278		0.00626374	1.5027
-	CJSA_1435	R	hypothetical protein	56	184		2.00984e-21	3.28571
dapF	CJSA_1447	E	diaminopimelate epimerase	39	62		0.00240085	1.58974
-	CJSA_1449	R	putative helix-turn-helix containing protein	30	73		3.72929e-10	2.43333
-	CJSA_1460		hypothetical protein	15	24		0.000494299	1.6
rloH	CJSA_1466	R	putative ATP/GTP-binding protein	9	27		5.01158e-21	3
nuoM	CJSA_1479	C	NADH dehydrogenase I subunit M	24	55		1.07593e-08	2.29167
-	CJSA_1486		hypothetical protein	25	51		1.91613e-08	2.04
nuoA	CJSA_1491	C	NADH dehydrogenase I subunit A	36	74		3.01896e-09	2.05556
-	CJSA_1501	R	hypothetical protein	16	24		0.00148001	1.5
infA	CJSA_1502	J	translation initiation factor IF-1	32	73		1.66611e-10	2.28125
rpmJ	CJSA_1503		50S ribosomal protein L36	466	835		8.5878e-05	1.79185
rpsK	CJSA_1505	J	30S ribosomal protein S11	461	722		0.0127187	1.56616
-	CJSA_1520	TK	putative two-component regulator	8	26		3.13486e-23	3.25
rpsT	CJSA_1523	J	30S ribosomal protein S20	135	204		0.00595938	1.51111
-	CJSA_1533		hypothetical protein	14	31		1.25405e-11	2.21429
-	CJSA_1544		hypothetical protein	26	99		3.09409e-31	3.80769
-	CJSA_1549	G	hypothetical protein	5	32		4.28239e-88	6.4
dnaG	CJSA_1550	L	DNA primase	17	27		0.0019095	1.58824
-	CJSA_1552		hypothetical protein	18	42		9.04311e-14	2.33333
murE	CJSA_1553	M	UDP-N-acetylmuramoylalanyl-D-glutamate--2,6-diaminopimelate ligase	23	41		0.000147079	1.78261
-	CJSA_1554	S	hypothetical protein	44	96		3.22598e-10	2.18182
-	CJSA_1555	O	PDZ domain-containing periplasmic protein	50	73		0.00975559	1.46
-	CJSA_1562		hypothetical protein	77	163		1.91166e-07	2.11688
nhaA1	CJSA_1567	P	Na+/H+ antiporter	25	60		4.70249e-10	2.4
-	CJSA_1579		hypothetical protein	26	44		2.463e-05	1.69231
cgpA	CJSA_1581		hypothetical protein	33	50		0.00126973	1.51515
-	CJSA_1590		hypothetical protein	11	32		6.50356e-19	2.90909
-	CJSA_1596	G	putative MSF family efflux protein	23	92		4.02493e-35	4
rpsJ	CJSA_1617	J	30S ribosomal protein S10	293	512		1.52915e-05	1.74744
ksgA	CJSA_1620	J	dimethyladenosine transferase	44	66		0.00829701	1.5
-	CJSA_1624	R	GNAT family acetyltransferase	15	38		1.18298e-14	2.53333
-	CJSA_pVir0013		hypothetical protein	6	32		3.95526e-50	5.33333
-	CJSA_pVir0024		putative plasmid partioning ParA protein	33	147		1.69866e-54	4.45455
-	CJSA_pVir0025		hypothetical protein	19	101		3.27344e-91	5.31579
repE	CJSA_pVir0026		putative replication protein RepE	26	169		1.38992e-136	6.5
-	CJSA_pVir0032		hypothetical protein	18	27		0.00147934	1.5
-	CJSA_pVir0040		hypothetical protein	11	43		1.43155e-25	3.90909
-	CJSA_pVir0041		hypothetical protein	27	47		0.000285449	1.74074
-	CJSA_pVir0042		hypothetical protein	8	77		1.91964e-243	9.625
-	CJSA_pVir0044		hypothetical protein	5	69		0	13.8
-	CJSA_pVir0045		hypothetical protein	66	112		2.40325e-05	1.69697
-	CJSA_pVir0046		putative RelE/StbE family addiction module toxin	16	36		1.31988e-07	2.25
-	CJSA_t0001		Ala tRNA	27	91		1.12587e-18	3.37037
-	CJSA_t0002		Ile tRNA	49	156		1.08194e-19	3.18367
-	CJSA_t0004		Ala tRNA	35	75		4.42971e-07	2.14286
-	CJSA_t0005		Ile tRNA	49	145		2.73794e-16	2.95918
-	CJSA_t0006		Thr tRNA	97	153		0.000545284	1.57732
-	CJSA_t0014		Ala tRNA	34	85		3.75151e-10	2.5
-	CJSA_t0015		Ile tRNA	51	152		5.29788e-17	2.98039
-	CJSA_t0019		Asp tRNA	25	37		0.0265216	1.48
-	CJSA_t0023		Val tRNA	64	95		0.0076264	1.48438
-	CJSA_t0024		Lys tRNA	29	43		0.0210972	1.48276
-	CJSA_t0043		Ala tRNA	19	36		1.05999e-05	1.89474
-	CJSA_t0044		Val tRNA	53	106		1.51227e-06	2
-	predicted RNA		61nt length; 809228 to 809167 negative strand	59	86		0.00704506	1.45763
-	predicted RNA		antisense: ispG; 155nt length, 644706 to 644551 negative strand	32	47		0.00994778	1.46875
-	predicted RNA		34nt length; 1522668 to 1522702 positive strand	44	67		0.00515046	1.52273
-	predicted RNA		14nt length; 684021 to 684007 negative strand	122	194		0.00430638	1.59016
-	predicted RNA		269nt length; 1555790 to 1555521 negative strand	95	153		0.000812371	1.61053
-	predicted RNA		38nt length; 601206 to 601168 negative strand	98	164		0.000469196	1.67347
-	predicted RNA		152nt length; 675392 to 675240 negative strand	305	511		0.000584292	1.67541
-	predicted RNA		11nt length; 914526 to 914537 positive strand	61	103		0.00202463	1.68852
-	predicted RNA		99nt length; 250059 to 249960 negative strand	94	159		2.31936e-05	1.69149
-	predicted RNA		antisense: CJSA_0417; 44nt length, 419785 to 419741 negative strand	99	172		0.000233778	1.73737
-	predicted RNA		109nt length; 815016 6o 815125 positive strand	52	91		0.000106877	1.75
-	predicted RNA		39nt length; 1113972 to 1113933 negative strand	216	384		3.88412e-06	1.77778
-	predicted RNA		antisense: CJSA_0390; 81nt length, 388537 to 388618 positive strand	41	73		0.000106877	1.78049
-	predicted RNA		antisense: CJSA_0363; 359nt length, 362675 to 363316 negative strand	72	137		4.77667e-06	1.90278
-	predicted RNA		antisense: CJSA_0401; 61nt length, 395623 to 39684 negative strand	149	292		3.77055e-08	1.95973
-	predicted RNA		10nt length; 1163099 to 1163109 positive strand	55	110		3.94941e-05	2
-	predicted RNA		70nt length; 1175070 to 1175140 positive strand	106	238		1.87449e-10	2.24528
-	predicted RNA		13nt length; 1153787 to 1153800 positive strand	1007	2350		1.78751e-12	2.33366
-	predicted RNA		22nt length; 1053999 to 1053977 negative strand	46	112		1.38576e-10	2.43478
-	predicted RNA		31nt length; 1386286 to 1386313 positive strand	119	296		3.90878e-11	2.48739
-	predicted RNA		antisense: pbpA; 61nt length, 479304 to 479243 negative strand	14	37		2.07378e-11	2.64286
-	predicted RNA		711nt length; 197103 to 197814 positive strand	41	121		8.51464e-17	2.95122
-	predicted RNA		101nt length; 726401 to 726300 negative strand	179	572		1.54496e-27	3.19553
-	predicted RNA		16nt length; 71942 to 71926 negative strand	77	252		5.15179e-22	3.27273
-	predicted RNA		34nt length; 1555303 to 1555269 negative strand	11	37		2.00404e-18	3.36364
-	predicted RNA		antisense: CJSA_0826; 174nt length, 818541 to 818715 positive strand	13	44		3.09715e-20	3.38462
-	predicted RNA		23nt length; 197874 to 197897 positive strand	13	46		5.12704e-17	3.53846
-	predicted RNA		69nt length; 210449 to 210518 positive strand	17	63		1.08368e-26	3.70588
-	predicted RNA		129nt length; 1193304 to 1193433 positive strand	23	105		3.15796e-45	4.56522
-	predicted RNA		94nt length; 1572367 to 1572461 positive strand	13	62		9.62968e-47	4.76923
-	predicted RNA		35nt length; 1259305 to 1259340 positive strand	37	177		2.20239e-54	4.78378
-	predicted RNA		42nt length; 735002 to 735044 positive strand	26	130		1.88508e-57	5
-	predicted RNA		18nt length; 1463578 to 1453560 negative strand	22	113		2.72513e-54	5.13636
-	predicted RNA		9nt length; 198494 to 198503 positive strand	18	116		2.31579e-87	6.44444
-	predicted RNA		23nt length; 198048 to 198071 positive strand	10	72		1.7756e-103	7.2
-	predicted RNA		20nt length; 409962 to 409982 positive strand	12	89		1.80638e-109	7.41667
-	predicted RNA		37nt length; 198556 to 198593 positive strand	16	130		4.12629e-153	8.125
-	predicted RNA		17nt length; 1482 to 1465 positive strand	6	97		0	16.1667
-	predicted RNA		19nt length; 59713 to 59732 positive strand	8	153		0	19.125
-	predicted RNA		24nt length; 828765 to 828741 negative strand	2	45		0	22.5
-	predicted RNA		13nt length; 645467 to 645454 negative strand	1	29		1.10954e-186	29
-	predicted RNA		25nt length; 31479 to 31504 positive strand pVir	47	108		6.10494e-09	2.29787

## Sheet: S5-Bile 2 hr genes diff exp
Supplementary Table S4. Genes with demonstrated significant changes in expression, 2 hour in vitro bile exposure.
				Expression (RPKM)			Significance
Name	Synonym	COG Code	Product	Plate 16hr	Bile in vitro 2 hr		Q Value	Fold change
DECREASED EXPRESSION AT 2 HOURS EXPOSURE TO BILE
-	CJSA_0025	R	sodium/dicarboxylate symporter	151	64		0.000511302	-2.35938
-	CJSA_0158		hypothetical protein	1356	678		0.0104473	-2
cjaA	CJSA_0925	ET	putative amino-acid transporter periplasmic solute-binding protein	1299	370		4.22513e-08	-3.51081
cetB	CJSA_1127	T	bipartate energy taxis response protein cetB	314	128		0.00315355	-2.45312
cetA	CJSA_1128	NT	bipartate energy taxis response protein cetA	433	241		0.0436635	-1.79668
-	CJSA_1138	P	putative NLPA family lipoprotein	156	55		0.00213555	-2.83636
metE	CJSA_1139	E	5-methyltetrahydropteroyltriglutamate/homocysteine S-methyltransferase	140	46		2.8235e-08	-3.04348
metF	CJSA_1140	E	5,10-methylenetetrahydrofolate reductase	38	9		2.38352e-06	-4.22222
putP	CJSA_1424	ER	putative sodium/proline permease	451	231		0.0208752	-1.95238
-	CJSA_1573	M	ABC transporter permease	35	12		0.00871316	-2.91667
-	CJSA_pVir0008		hypothetical protein	644	254		0.015895	-2.53543
-	CJSA_pVir0009		hypothetical protein	1372	577		0.00474952	-2.37782
-	CJSA_pVir0050		hypothetical protein	128	31		6.09502e-07	-4.12903
-	CJSA_pVir0051		hypothetical protein	40	9		0.000149578	-4.44444
-	CJSA_t0017		Gly tRNA	154	47		0.023404	-3.2766
-	CJSA_t0030		Ser tRNA	436	122		5.69826e-05	-3.57377
-	predicted RNA		106nt length; 1331076 to 1331182 positive strand	233	49		1.97337e-07	-4.7551
-	predicted RNA		176nt length; 1331258 to 1331434 positive strand	198	45		1.02007e-07	-4.4
-	predicted RNA		antisense: glnQ; 86 nt length, 845047 to 844961 negative strand	179	51		0.00445887	-3.5098
-	predicted RNA		antisense: CJSA_0215; 50nt length, 226428 to 226378 negative strand	136	41		0.0229421	-3.31707
-	predicted RNA		9nt length; 1133562 to 1133571 positive strand	120	38		0.00465094	-3.15789
INCREASED EXPRESSION AT 2 HOURS EXPOSURE TO BILE
dnaA	CJSA_0001	L	chromosomal replication initiator protein DnaA	21	48		1.99484e-08	2.28571
-	CJSA_0035	G	MFS family drug resistance transporter	15	30		1.64381e-08	2
-	CJSA_0040		hypothetical protein	15	164		0	10.9333
-	CJSA_0041		hypothetical protein	62	102		0.000561932	1.64516
flgD	CJSA_0042	N	flagellar basal body rod modification protein	309	604		0.00164046	1.95469
-	CJSA_0045	P	putative iron-binding protein	39	148		2.75264e-29	3.79487
-	CJSA_0049		hypothetical protein	53	79		0.0129	1.49057
-	CJSA_0056		hypothetical protein	34	54		3.92479e-05	1.58824
folK	CJSA_0059	H	2-amino-4-hydroxy-6-hydroxymethyldihydropteridine pyrophosphokinase	21	61		8.64684e-22	2.90476
cdtC	CJSA_0070		cytolethal distending toxin C	19	28		0.000458042	1.47368
cdtB	CJSA_0071		cytolethal distending toxin B	57	104		0.000148924	1.82456
atpF'	CJSA_0093	C	F0F1 ATP synthase subunit B	67	127		2.23785e-05	1.89552
-	CJSA_0113		hypothetical protein	115	225		3.02147e-06	1.95652
-	CJSA_0126	K	hypothetical protein	19	43		4.85306e-09	2.26316
-	CJSA_0134	P	cation ABC transporter substrate-binding protein	72	106		0.0129	1.47222
-	CJSA_0166		putative lipoprotein	14	31		8.85066e-07	2.21429
tetO	CJSA_0193	J	tetracycline resistance protein	158	257		0.0269256	1.62658
-	CJSA_0242	C	putative cytochrome C-type heme-binding periplasmic protein	257	411		0.00543077	1.59922
-	CJSA_0305		hypothetical protein	124	190		0.00648821	1.53226
cmeB	CJSA_0339	V	RND efflux system, inner membrane transporter CmeB	82	137		0.033017	1.67073
cmeA	CJSA_0340	M	RND efflux system, membrane fusion protein CmeA	102	232		7.53113e-10	2.27451
-	CJSA_0370		hypothetical protein	9	23		2.87668e-13	2.55556
-	CJSA_0389		hypothetical protein	178	344		6.19619e-06	1.93258
-	CJSA_0390		hypothetical protein	30	52		8.33249e-06	1.73333
-	CJSA_0394		putative H-T-H containing protein	20	38		6.11658e-06	1.9
sdhA	CJSA_0409	C	succinate dehydrogenase, flavoprotein subunit	35	86		2.1861e-10	2.45714
sdhB	CJSA_0410	C	succinate dehydrogenase, iron-sulfur protein subunit	37	93		9.61431e-11	2.51351
sdhB	CJSA_0411	C	succinate dehydrogenase subunit C	49	82		0.00140384	1.67347
-	CJSA_0426		hypothetical protein	12	21		1.12929e-06	1.75
dapA	CJSA_0451	EM	dihydrodipicolinate synthase	74	115		0.00508849	1.55405
-	CJSA_0456	IQ	short chain dehydrogenase	26	40		0.000516529	1.53846
clpB	CJSA_0479	O	ATP-dependent chaperone protein ClpB	483	1190		0.0470198	2.46377
flgB	CJSA_0495	N	flagellar basal-body rod protein FlgB	362	542		0.0305593	1.49724
-	CJSA_0528		hypothetical protein	55	950		0	17.2727
ribB	CJSA_0540	H	bifunctional 3,4-dihydroxy-2-butanone 4-phosphate synthase/GTP cyclohydrolase II protein	82	126		0.00362193	1.53659
nth	CJSA_0563	L	endonuclease III	11	25		1.22201e-09	2.27273
-	CJSA_0596	L	prophage Lp2 protein 6	72	107		0.00948155	1.48611
argG	CJSA_0630	E	argininosuccinate synthase	244	386		0.0458744	1.58197
-	CJSA_0636		hypothetical protein	26	39		0.00213368	1.5
flgH	CJSA_0651	N	flagellar basal body L-ring protein	197	400		2.10915e-06	2.03046
-	CJSA_0655		hypothetical protein	16	26		4.35663e-05	1.625
flgG	CJSA_0662	N	flagellar basal-body rod protein FlgG	368	648		0.0087686	1.76087
mogA	CJSA_0689	H	molybdenum cofactor biosynthesis protein	109	171		0.00558482	1.56881
hcrA	CJSA_0713	K	heat-inducible transcription repressor	265	485		0.00734234	1.83019
grpE	CJSA_0714	O	heat shock protein GrpE	346	607		0.00746749	1.75434
-	CJSA_0716	R	hypothetical protein	64	106		0.001271	1.65625
-	CJSA_0726	P	NLPA family lipoprotein	52	86		0.00134023	1.65385
-	CJSA_0727	P	NLPA family lipoprotein	97	163		0.000531369	1.68041
-	CJSA_0732		hypothetical protein	43	79		0.000122865	1.83721
-	CJSA_0747	E	aminotransferase	11	22		2.84281e-08	2
fliP	CJSA_0775	NU	flagellar biosynthetic protein FliP	14	25		7.70324e-07	1.78571
-	CJSA_0785	S	hypothetical protein	11	25		7.24541e-09	2.27273
fspA2	CJSA_0814		FspA2	114	202		0.000413516	1.77193
-	CJSA_0818		hypothetical protein	109	293		1.88489e-12	2.68807
dsbB	CJSA_0819	O	putative disulfide oxidoreductase	54	140		2.86191e-11	2.59259
-	CJSA_0823	C	putative cytochrome C	90	133		0.0139963	1.47778
flgL	CJSA_0833	N	flagellar hook-associated protein FlgL	155	288		0.00492441	1.85806
-	CJSA_0852	S	hypothetical protein	30	44		0.0083209	1.46667
-	CJSA_0855		hypothetical protein	16	29		3.06521e-06	1.8125
-	CJSA_0920	Q	hypothetical protein	521	1202		1.07449e-05	2.3071
rpoD	CJSA_0944	K	RNA polymerase sigma factor RpoD	83	142		0.00256614	1.71084
cmeE	CJSA_0975	M	membrane fusion component of efflux system (multidrug efflux system CmeDEF)	23	34		0.000413516	1.47826
-	CJSA_0977	O	adenylosuccinate lyase	37	88		1.2675e-09	2.37838
murC	CJSA_0997	M	UDP-N-acetylmuramate--L-alanine ligase	34	58		0.000834579	1.70588
rho	CJSA_1096	K	transcription termination factor Rho	59	94		0.00218548	1.59322
-	CJSA_1129	T	putative PAS domain containing signal-transduction sensor protein	24	44		1.97413e-07	1.83333
-	CJSA_1146	H	putative 5-formyltetrahydrofolate cyclo-ligase family protein	14	22		2.05927e-05	1.57143
cbpA	CJSA_1167	O	co-chaperone protein DnaJ	107	196		8.33249e-06	1.83178
hspR	CJSA_1168	K	heat shock transcriptional regulator	176	291		0.00127834	1.65341
-	CJSA_1180		hypothetical protein	470	887		0.000106303	1.88723
pnp	CJSA_1192	J	polynucleotide phosphorylase/polyadenylase	60	88		0.0132012	1.46667
-	CJSA_1194	R	putative isomerase	13	25		8.33249e-06	1.92308
pseB	CJSA_1231	MG	UDP-GlcNAc-specific C4,6 dehydratase/C5 epimerase	301	569		0.0017458	1.89037
pseC	CJSA_1232	M	C4 aminotransferase specific for PseB product	102	174		0.000205714	1.70588
-	CJSA_1233	R	hypothetical protein	22	36		0.001271	1.63636
pseA	CJSA_1254	D	pseudaminic acid biosynthesis PseA protein	337	756		0.013143	2.24332
maf1	CJSA_1256	S	motility accessory factor	19	46		1.30071e-09	2.42105
neuC2	CJSA_1264	M	putative UDP-N-acetylglucosamine 2-epimerase	13	23		9.5657e-06	1.76923
-	CJSA_1266	R	hypothetical protein	24	38		0.000427276	1.58333
ptmB	CJSA_1267	M	cylneuraminate cytidylyltransferase (flagellin modification)	122	256		3.57144e-08	2.09836
ptmA	CJSA_1268	IQ	flagellin modification protein A	94	174		3.2733e-05	1.85106
maf4	CJSA_1271	S	motility accessory factor	18	42		9.10211e-09	2.33333
pseE	CJSA_1272	S	PseE protein	43	72		0.000516529	1.67442
nrfA	CJSA_1292	P	putative periplasmic cytochrome C	37	117		6.59578e-21	3.16216
nrfH	CJSA_1293	C	putative periplasmic cytochrome C	16	124		1.37696e-225	7.75
-	CJSA_1304	R	putative nucleotide phosphoribosyltransferase	26	40		0.000219741	1.53846
-	CJSA_1315		putative lipoprotein	21	32		0.000277702	1.52381
-	CJSA_1321	S	helix-turn-helix containing protein	17	37		4.3431e-11	2.17647
prfB	CJSA_1379	J	peptide chain release factor 2	30	44		0.0142373	1.46667
flgI	CJSA_1386	N	lagellar basal body P-ring protein	218	397		0.00848786	1.8211
-	CJSA_1387		hypothetical protein	89	148		0.000921508	1.66292
flgK	CJSA_1390	N	flagellar hook-associated protein FlgK	127	237		0.00614374	1.86614
dapF	CJSA_1447	E	diaminopimelate epimerase	39	59		0.00620974	1.51282
hsdM	CJSA_1469	V	putative type I restriction enzyme M protein	35	53		0.0118763	1.51429
infA	CJSA_1502	J	translation initiation factor IF-1	32	55		1.07449e-05	1.71875
rpsT	CJSA_1523	J	30S ribosomal protein S20	135	205		0.00684357	1.51852
-	CJSA_1533		hypothetical protein	14	27		1.70508e-08	1.92857
-	CJSA_1544		hypothetical protein	26	81		1.38036e-19	3.11538
-	CJSA_1554	S	hypothetical protein	44	65		0.000605143	1.47727
-	CJSA_1562		hypothetical protein	77	112		0.0129	1.45455
-	CJSA_1596	G	putative MSF family efflux protein	23	71		3.7428e-18	3.08696
-	CJSA_1624	R	GNAT family acetyltransferase	15	25		2.05927e-05	1.66667
ssb	CJSA_pVir0014		putative single stranded DNA binding protein	87	145		0.00110267	1.66667
-	CJSA_pVir0024		putative plasmid partioning ParA protein	33	137		9.33626e-46	4.15152
-	CJSA_pVir0025		hypothetical protein	19	80		4.86531e-53	4.21053
repE	CJSA_pVir0026		putative replication protein RepE	26	113		1.2969e-51	4.34615
-	CJSA_pVir0040		hypothetical protein	11	27		1.71616e-08	2.45455
-	CJSA_pVir0042		hypothetical protein	8	32		3.12517e-31	4
-	CJSA_pVir0044		hypothetical protein	5	30		9.58457e-55	6
rnpB	CJSA_CjrnpB1		-	22	48		2.21151e-09	2.18182
-	CJSA_t0001		Ala tRNA	27	60		4.79728e-07	2.22222
-	CJSA_t0002		Ile tRNA	49	94		5.68789e-06	1.91837
-	CJSA_t0004		Ala tRNA	35	51		0.00425447	1.45714
-	CJSA_t0014		Ala tRNA	34	68		3.87468e-06	2
-	CJSA_t0015		Ile tRNA	51	86		0.000136781	1.68627
-	CJSA_t0018		Leu tRNA	43	67		0.000684296	1.55814
-	CJSA_t0023		Val tRNA	64	107		0.00026845	1.67188
-	CJSA_t0043		Ala tRNA	19	31		0.000308135	1.63158
-	CJSA_t0044		Val tRNA	53	96		2.05927e-05	1.81132
-	predicted RNA		42nt length; 735002 to 735044 positive strand	26	38		0.00332562	1.46154
-	predicted RNA		14nt length; 684021 to 684007 negative strand	122	187		0.00330385	1.53279
-	predicted RNA		129nt length; 199501 to 199372 negative strand	95	148		0.000127178	1.55789
-	predicted RNA		antisense: CJSA_0390; 81nt length; 388537 to 388618 positive strand	41	64		0.000756835	1.56098
-	predicted RNA		18nt length; 1463578 to 1463560 negative strand	22	35		0.00213555	1.59091
-	predicted RNA		antisense: ispG; 155nt length, 644706 to 644551 negative strand	32	53		0.000315675	1.65625
-	predicted RNA		269nt length; 1555790 to 1555521 negative strand	95	159		0.000302845	1.67368
-	predicted RNA		70nt length; 1175070 to 1175140 positive strand	106	181		1.2552e-05	1.70755
-	predicted RNA		54nt length; 388170 to 188224 positive strand	112	197		2.05927e-05	1.75893
-	predicted RNA		94nt length; 1572367 to 1572461 positive strand	13	23		0.000125915	1.76923
-	predicted RNA		23nt length; 197874 to 197897 positive strand	13	23		0.00108486	1.76923
-	predicted RNA		antisense: pbpA; 61nt length, 479304 to 479243 negative strand	14	25		0.000113528	1.78571
-	predicted RNA		11nt length; 914526 to 914537 positive strand	61	110		0.000118925	1.80328
-	predicted RNA		16nt length; 71942 to 71926 negative strand	77	139		1.18585e-05	1.80519
-	predicted RNA		12nt length; 1153787 to 1153800 positive strand	1007	1861		5.14894e-07	1.84806
-	predicted RNA		69nt length; 210449 to 210518 positive strand	17	32		1.30504e-05	1.88235
-	predicted RNA		antisense: CJSA_0417; 44nt length, 419785 to 419741 negative strand	99	190		5.5074e-06	1.91919
-	predicted RNA		35nt length; 1259305 to 1259340 positive strand	37	79		4.30582e-08	2.13514
-	predicted RNA		10nt length; 1163099 to 1163109 positive strand	55	119		7.39076e-07	2.16364
-	predicted RNA		109nt length; 815016 to 815125 positive strand	52	122		2.60886e-10	2.34615
-	predicted RNA		antisense: CJSA_0921; 93nt length, 915128 to 915221 positive strand	45	106		8.07748e-10	2.35556
-	predicted RNA		31nt length; 1386282 to 1386313 positive strand	119	291		5.44274e-11	2.44538
-	predicted RNA		101nt length; 726401 to 726300 negative strand	179	470		8.38872e-17	2.6257
-	predicted RNA		711nt length; 197103 to 197814 positive strand	41	108		3.376e-12	2.63415
-	predicted RNA		22nt length; 1053999 to 1053977 negative strand	46	123		2.58777e-14	2.67391
-	predicted RNA		99nt length; 250049 to 249960 negative strand	94	267		2.4827e-21	2.84043
-	predicted RNA		37nt length; 198556 to 198593 positive strand	16	48		2.28152e-14	3
-	predicted RNA		23nt length; 198048 to 198071 positive strand	10	31		3.06962e-14	3.1
-	predicted RNA		9nt length; 198494 to 198503 positive strand	18	63		4.16436e-21	3.5
-	predicted RNA		34nt length; 1555303 to 1555269 negative strand	11	40		3.14331e-24	3.63636
-	predicted RNA		20nt length; 409962 to 409982 positive strand	12	68		4.07484e-59	5.66667
-	predicted RNA		17nt length; 1465 to 1482 positive strand	6	38		1.98272e-59	6.33333
-	predicted RNA		19nt length; 59713 to 59732 positive strand	8	67		7.13676e-132	8.375
-	predicted RNA		24nt length; 828765 to 828741 negative strand	2	34		1.72042e-277	17
-	predicted RNA		25nt length; 31479 to 31504 positive strand pVir	47	85		2.39128e-05	1.80851

## Sheet: S6-ncRNA diff exp
Supplementary Table S6. List of the 29 non-coding RNA genes found to be differentially expressed under all 4 conditions as generated by Rockhopper
Transcription Start	Transcription Stop
		Length	Strand	LFG	RFG	Orientation	Assessment
INCREASED EXPRESSION IN ALL 4 CONDITIONS
1465	1482	17	+	dnaA	dnaN	>>>	5' UTR of dnaN
59713	59732	19	+	CjSA_0040	CjSA_0041	>>>	5'UTR of CjSA_0041
71942	71926	16	-	CjSA_0050	CjSA_0051	<<>	5'UTR of CjSA_0051
197874	197897	23	+	CjSA_0190	CjSA_0192	<><	region of tetO insertion
198048	198071	23	+	CjSA_0190	CjSA_0192	<><	region of tetO insertion
198494	198503	9	+	CjSA_0190	CjSA_0192	<><	region of tetO insertion
198556	198593	37	+	CjSA_0190	CjSA_0192	<><	region of tetO insertion
210449	210518	69	+	CjSA_0199	argC	>>>	region of CjSA_0200 (frameshift)
388537	388618	81	+	CjSA_0389	CjSA_0390	>><	overlap of 3' end of CjSA_0389 with 3' end of CjSA_0390
409962	409982	20	+	CjSA_0408	sdhA	>>>	5' UTR of sdhA
419785	419741	44	-	CjSA_0417	CjSA_0418	><<	overlap of 3' end of CjSA_418 with 3' end of CjSA_0417
479304	479243	61	-	pbpA	clpB	><<	overlap of 3' end of clpB with 3' end of pbpA
644706	644551	155	-	ispG	flgH	><<	overlap of 3' end of flgH with 3' end of ispG
726401	726300	101	-	CjSA_0728	CjSA_0729	<<<	5'UTR of CjSA_0728
815016	815125	109	+	dsbB	dsbA	>>>	region of CjSA_0820 (degenerate)
828765	828741	24	-	flgL	CjSA_t0016	<<>	5' UTR of flgL
914526	914537	11	+	CjSA_0919	CjSA_0920	>>>	5'UTR of CjSA_0920
1053999	1053977	22	-	cheY	pglG	<<<	5' UTR of cheY
1163099	1163109	10	+	cbpA	hspR	>>>	intergenic, possible readthrough of operon
1175070	1175140	70	+	CjSA_1180	hemE	>>>	Intergenic, possible readthrough of CjSA_1180
1259305	1259340	35	+	CjSA_1262	neuB2	>>>	intergenic, possible 5' UTR of neuB2
1386282	1386313	31	+	CjSA_1374	dut	>>>	intergenic, possible readthrough of operon
1463578	1463560	18	-	CjSA_1450	pgi	<<<	5'UTR of CjSA_1450
1555303	1555269	34	-	tonB2	CjSA_1544	> <<	region of CjSA_1543 (degenerate)
1572367	1572461	94	+	CjSA_1562	map	>><	intergenic
31479	31504	25	+	CjSA_pVir0047	CjSA_pVir0048	>>>	3' end of CjSA_pVir0047
DECREASED EXPRESSION IN ALL 4 CONDITIONS
845047	844961	86	-	glnQ	CjSA_0849	><<	overlap of 3' end of CjSA_0849 with 3' end of glnQ
1331076	1331182	-106	+	CjSA_1322	metC	>>>	region of CjSA_1323 (degenerate dcuD)
1331258	1331434	-176	+	CjSA_1322	metC	>>>	region of CjSA_1323 (degenerate dcuD)
LFG = left flanking gene
RFG = right flanking gene
<<< or >>> = flanking genes and ncRNA expressed in the same direction
><> or >>< = flanking genes and ncRNA expressed in different directions
